# Supplementary material
Source: PubMed Central journal article supplement (PMC7673303)
Supplement: NEJMc2031364_appendix.pdf [file NEJMc2031364_appendix.pdf]

## Supplementary Appendix

This appendix has been provided by the authors to give readers additional information about their work.

Supplement to: Choi B, Choudhary MC, Regan J, et al. Persistence and evolution of SARS-CoV-2 in an immunocompromised host. *N Engl J Med*. DOI: [10.1056/NEJMc2031364](https://doi.org/10.1056/NEJMc2031364)

## SUPPLEMENTARY APPENDIX

### Table of Contents

|                                                    |           |
|----------------------------------------------------|-----------|
| Supplemental results                               | pp. 2-3   |
| Supplemental information regarding clinical course | pp. 4-5   |
| Supplemental methods                               | pp. 6-9   |
| Supplemental figures                               | pp. 10-21 |
| Supplemental tables                                | pp. 22-43 |
| Acknowledgements                                   | p. 44     |
| Supplemental references                            | p. 45     |

## **SUPPLEMENTAL RESULTS**

### **Virologic studies**

Quantitative SARS-CoV-2 viral load testing, concordant with the clinical NP RT-PCR Ct values, demonstrated a peak of 8.86 log<sub>10</sub> SARS-CoV-2 RNA copies/mL from the NP swab on Day 143 (Figure S2, Table S1). Increases in NP viral loads were mirrored by increases in sputum and plasma viral loads.

SARS-CoV-2 whole viral sequencing was performed from two to three NP samples each from within four time points: initial infection (T0: Days 18, 25), first recurrence (T1: Days 75, 81), second recurrence (T2: Days 128, 130), and third recurrence (T3: Days 143, 146, 152). Within the first three time points, the two samples showed identical sequences. By the last time point (T3: Days 143, 146, 152), there was evidence of continued SARS-CoV-2 sequence changes and increasing viral diversification. The phylogenetic results were consistent with viral persistence and disease recurrence,<sup>1,2</sup> rather than re-infection<sup>3,4</sup>, as all sequences had a common ancestor and differed from all other sequences from Massachusetts (Figures 1a, S6). Between T0 and T1, 11 nucleotide substitutions (2 synonymous, 9 non-synonymous) and a 9-nucleotide deletion were identified. Between T1 and T2, another 10 nucleotide substitutions (3 synonymous, 7 non-synonymous) and a 1-nucleotide deletion were identified (Figure 1b). Between T2 and T3, 11 nucleotide substitutions (3 synonymous, 8 non-synonymous), a 21-nucleotide deletion (Day 146), and a 3-nucleotide deletion (Day 152) were identified. Non-synonymous nucleotide changes were predominantly in the spike (S) region, which comprises 13% of the SARS-CoV-2 genome, but had 57% of the observed changes. Within the spike region, mutations arose at a disproportionately high rate in the receptor binding domain (RBD), which comprises 2% of the genome, but had 38% of all observed changes.

Previously reported resistance mutations to remdesivir were not detected,<sup>5</sup> and no emerging mutations were identified in the RNA-dependent RNA polymerase gene, despite four courses of remdesivir.

We also compared the viral sequences against previously reported sites of potential resistance mutations against the Regeneron antibody cocktail (Table S3).<sup>6</sup> The Regeneron antibody was given on Day 145. We detected the Q493K polymorphism in sequences from both before and after antibody treatment. This mutation was reported after passage experiments against REGN10933, but not REGN10987. On Day 152, we detected the F486I amino acid change. F486V has been described in passage experiments with REGN10933, but it is unclear what effect, if any, F486I has on antibody resistance. We did not detect the emergence of amino acid changes that could increase the risk of resistance to both antibodies. This is concordant with the steep drop in SARS-CoV-2 viral load after antibody administration. Viral sequences can be located with GISAID accession numbers EPI\_ISL\_593480, EPI\_ISL\_593557, EPI\_ISL\_593558, EPI\_ISL\_593555, EPI\_ISL\_593478, EPI\_ISL\_593479, EPI\_ISL\_593556, EPI\_ISL\_593553, EPI\_ISL\_593554.

Viral infectivity studies were performed using nasopharyngeal swab fluid samples (Days 75, 143). Results were consistent with infectious virus (Figure S7). This is the longest duration of infectious SARS-CoV-2 virus isolated from a patient, reported to date.

### **Immunologic studies**

Immunophenotyping demonstrated low levels of B and plasmacytoid dendritic cells, robust T-cell responses to wild-type SARS-CoV-2 virus, initial IgM seroconversion with delayed IgG and waning IgM/IgA titers, and low levels of neutralizing antibodies. The specificity of the immune response for the mutated form of the virus has not yet been assessed.

#### *Immunophenotyping*

Immunophenotyping performed on peripheral blood mononuclear cells (PBMC) from Day 81, compared to age-matched Covid-19 patient controls (Table S4), demonstrated very low total B cells, of which the antibody-secreting subset was predominant (Figure S8). There was a marked reduction in plasmacytoid dendritic cells (pDC). Other

findings included reduced T follicular helper cell (Tfh) and classical monocyte levels compared to age-matched patients with Covid-19 (Figure S8).

#### *SARS-CoV-2-specific T cell proliferation studies*

The SARS-CoV-2 T cell proliferation assay from Day 81 demonstrated robust CD4 and CD8 T cell responses to SARS-CoV-2 spike and other structural protein antigens (Figure S9).

#### *SARS-CoV-2-specific (commercial) antibody, SARS-CoV-2-specific antibody isotyping, and SARS-CoV-2-specific neutralizing antibody studies*

The patient's clinical SARS-CoV-2 antibody testing with commercial assays showed initial seroconversion to IgM (Day 28) and later IgM and IgG (Days 81, 87). Antibody test of SARS-CoV-2 total immunoglobulins on Day 107 was negative (Figure S2, Table S2).

Additional SARS-CoV-2-specific antibody isotyping and subclass analysis was performed by Luminex assay (Figure S10). The patient's spike (S)- (and to a lesser extent) his nucleocapsid (N)-specific IgG1 titer was delayed, mounting higher titers only starting Day 77, but were then sustained throughout the remainder of his course despite recurrence of viremia at multiple timepoints. His IgA and IgM titers remained high throughout until a concurrent decline in titers against S and receptor binding domain (RBD) on Day 146, just after his third recurrence of infection (Day 143: RT-PCR Ct = 15.6) at which point he was treated with an anti-viral antibody cocktail, remdesivir, high dose corticosteroids (Days 143-153), and ruxolitinib (Day 143). While it is possible that IgA and IgM titers may have decreased in response to this combination of immunosuppression and high dose steroids, the decrease in antibody titer does precede most of the course of high dose steroid, raising the question of whether a drop in IgA and IgM may have been permissive of or exacerbated a rise in viral load. Notably, his SARS-CoV-2-specific IgG1 antibodies do not take into account viral escape from neutralizing antibodies, which may be of additional importance.

SARS-CoV-2-specific humoral responses were evaluated by neutralization antibody pseudovirus assays. Serum collected longitudinally from Days 31 through 87 was tested using pseudovirus expressing full length spike (G614) and 293T/ACE2 target cells. Patient samples demonstrated neutralizing activity, but neutralization was relatively similar across timepoints and significantly lower compared to convalescent positive controls (Figure S11). Additional analyses using a different pseudovirus expressing a cytoplasmic tail-truncated form of the spike (D614) protein and TZM.bl/ACE2 indicator cells showed similar results.

#### **Autopsy and tissue studies**

Quantitative SARS-CoV-2 viral load of autopsy samples was highest in the respiratory tract, but viral RNA was also detected in the spleen, heart, and gastrointestinal organs (Figure S4). Using the weight of the organs, we calculated the whole-body burden of SARS-CoV-2 and calculated that 18% of the detected RNA was located outside of the pulmonary system. This is likely a substantial underestimate as only a limited number of extra-pulmonary tissues were studied. Post-mortem exam showed active and remote DAH, with superimposed invasive necrotizing *Aspergillus fumigatus* pneumonia (Figure S5). The thoracic and abdominal lymph nodes showed a dramatic loss of normal architecture without germinal centers and a near absence of viable lymphocytes, and the spleen showed an absence of white pulp.

## **SUPPLEMENTAL INFORMATION REGARDING CLINICAL COURSE**

### *Initial infection*

A patient in his 40s with a history of catastrophic antiphospholipid syndrome (APS), complicated by venous thromboemboli, pulmonary emboli, thrombotic microangiopathy, adrenal hemorrhage, coronary vasculitis, and aortitis, was admitted with fever and nausea. The patient was diagnosed with APS in 1998, 22 years before presentation. Five months prior to presentation, he had been treated for diffuse alveolar hemorrhage (DAH), a rare complication of APS.<sup>7,8</sup> He was on warfarin for therapeutic anticoagulation, hydroxychloroquine, cyclophosphamide, and corticosteroids at prednisone 15 mg daily, and he had recently received rituximab and eculizumab (Figure S1). The patient reported chills, muscle aches and headache three days prior to hospitalization and subsequently developed dizziness, nausea without emesis, mid-central abdominal pain, anorexia and persistent fevers. At the time of initial presentation, he denied a change in his baseline exertional dyspnea on exertion. After two initial negative tests, the patient was diagnosed with Covid-19 by nasopharyngeal (NP) swab SARS-CoV-2 real-time reverse transcription polymerase chain reaction (RT-PCR, Hologic Panther), with a cycle threshold (Ct) of 32.4 (Day 0, Figure S2). Chest computed tomography (CT) showed multifocal ground glass opacities (GGOs) in a peribronchial distribution with subpleural sparing (Figure S3). Lab markers of Covid-19-associated cytokine storm were only modestly elevated (Table S5, Figure S12). He developed an oxygen requirement several days later. He was treated with five days of remdesivir and increased corticosteroids for suspected recurrent DAH. He was discharged on room air (Day 5).

Between Days 6 through 68, he was readmitted three times with abdominal pain and once with fatigue and dyspnea, for a total of 29 inpatient days. He otherwise quarantined alone at home and reported no known sick contacts. He had no pets. Admissions were complicated by hypoxemia concerning for recurrent DAH, for which he received higher doses of corticosteroids (Figures S1-S2). SARS-CoV-2 NP RT-PCRs continued to be positive through day 39, although with increasing Ct values suggesting resolving infection (Figure S1).<sup>9,10</sup>

### *First recurrence*

The patient was readmitted from Days 69 through 91 with hypoxemia, requiring up to 6 liters per minute of oxygen with exertion. He endorsed dyspnea but denied fever, productive cough, hemoptysis, sore throat, chest pain, and malaise. Labs were notable for lymphopenia and thrombocytopenia, but lab markers of inflammation remained modestly elevated (Table S5, Figure S12). Chest CT demonstrated increased multifocal peribronchial and subpleural GGOs with new areas of consolidation and architectural distortion (Figure S3). Transthoracic echocardiogram was normal. Anticoagulation, corticosteroids, hydroxychloroquine, and eculizumab were continued. On Day 72, he had a positive SARS-CoV-2 NP RT-PCR with Ct of 27.6, raising concerns for persistent SARS-CoV-2 and Covid-19 recurrence. The patient was treated with a second course of remdesivir for ten days. Subsequent NP RT-PCRs (Days 87, 88) were negative.

### *Second recurrence*

On Day 105, the patient was readmitted with lower extremity cellulitis. He was on room air at rest. Initial NP RT-PCR Ct was 36.9, and RT-PCR on Days 106 and 107 were negative. Anticoagulation, corticosteroids, hydroxychloroquine, and eculizumab were continued. On Day 111, the patient developed increased oxygen requirements and by Day 126 required high flow nasal cannula and admission to the medical intensive care unit. He received pulse-dose corticosteroids with intravenous methylprednisolone 1,000 mg for three days and was subsequently maintained on methylprednisolone 1 mg/kg/day. On Day 128, his NP RT-PCR reached a nadir of Ct 32.7, for which he received remdesivir for five days. Subsequent NP RT-PCR (Day 132) was negative.

### *Third recurrence*

The patient continued to have respiratory decline, raising concern for ongoing active DAH. While on corticosteroids, he received three days of intravenous immunoglobulin, intravenous cyclophosphamide, and daily ruxolitinib. On Day 143, NP RT-PCR was positive with Ct of 15.6. On Day 145, the decision was made to pursue

compassionate use of the Regeneron antibody cocktail against the SARS-CoV-2 viral spike protein.<sup>6</sup> Federal Drug Administration and Mass General Brigham institutional review board approval were granted, and the antibody cocktail was administered as a one-time dose of 8 grams of intravenous delivery of two antibodies (REGN10933 and REGN10987). On Day 150, the patient was intubated for ongoing hypoxemia. Bronchoalveolar lavage yielded an NP RT-PCR Ct of 15.8, for which he received another course of remdesivir, and *Aspergillus fumigatus*, for which he received antifungals. Despite these interventions, the patient developed worsening hemodynamics and respiratory failure and died on Day 154.

## **SUPPLEMENTAL METHODS**

Informed consent was obtained from this patient to participate in a Mass General Brigham Institutional Review Board (IRB)-approved Covid-19 observational sample collection protocol. We assessed levels of SARS-CoV-2 RNA in NP swabs, sputum, plasma, and post-mortem organs through a quantitative viral load assay.<sup>11</sup> Whole viral sequencing and maximum likelihood phylogenetic analyses were performed on longitudinal NP swab samples.<sup>12</sup> Viral infectivity studies were performed on NP swab fluid. Immune cell phenotyping included assays for neutralizing antibody titers, SARS-CoV-2-specific T cell activity, and cell surface marker analysis. Full Methods are below.

### *Nasopharyngeal RT-PCR*

Our clinical microbiology laboratory utilized the Hologic Panther Fusion SARS-CoV-2 real-time reverse transcription polymerase chain reaction (RT-PCR) for molecular testing for SARS-CoV-2 in inpatients. The Hologic Panther Fusion RT-PCR targets two regions of the Open reading frame 1ab (ORF1ab) gene that are specific to SARS-CoV-2. A specimen is considered positive if the gene target has a cycle threshold (Ct) of <40. The assay has a comparable limit of detection and was operated using protocols defined by the Emergency Use Authorization.

### *Quantitative viral load*

SARS-CoV-2 viral load was quantified in respiratory samples (nasopharyngeal, sputum) and plasma with a quantitative assay using the US CDC 2019-nCoV\_N1 primers and probe set.<sup>13-15</sup> Plasma, sputum, and nasopharyngeal swab fluids were centrifuged at approximately 21,000 x g for 2 hours at 4°C. The supernatant was removed and TRIzol-LS™ Reagent (Thermo Fisher, Waltham, MA, USA) was added to the pellets and then incubated on ice, followed by chloroform (MilliporeSigma, St. Louis, MO, USA). The mixtures were separated by centrifugation at 21,000 x g for 15 minutes at 4°C, and subsequently the aqueous layer was removed and treated with an equal volume of isopropanol (MilliporeSigma, St. Louis, MO, USA). GlycoBlue™ Coprecipitant (ThermoFisher, Waltham, MA, USA) and 100 µL 3M sodium acetate (ThermoFisher, Waltham, MA, USA) were added to each sample and incubated on dry ice until frozen. RNA was pelleted by centrifugation at 21,000 x g for 45 minutes at 4°C. The supernatant was discarded and the RNA was washed with cold 70% ethanol and resuspended in DEPC-treated water. Each reaction contained extracted RNA, 1X TaqPath™ 1-Step RT-PCR Master Mix, CG (ThermoFisher, Waltham, MA, USA), the CDC N1 forward and reverse primers, and probe.<sup>13</sup> Quantification of the Importin-8 (IPO8) housekeeping gene RNA level was performed to determine the quality of respiratory sample collections. An internal virion control (RCAS) was spiked into each sample and quantified to determine the efficiency of RNA extraction and PCR amplification.<sup>16</sup> SARS-CoV-2 viral loads below 40 RNA copies/mL were categorized as undetectable and set at 1.0 log<sub>10</sub> RNA copies/mL.

### *Post-mortem tissue RNA extraction*

Frozen tissue samples were thawed on ice and trimmed to a weight of 100mg. Samples were then minced in Trizol (ThermoFisher), homogenized by vortexing, and incubated at RT for 10 minutes. RNA was then extracted with a Direct-zol DNA/RNA miniprep kit (Zymo Research) according to manufacturer's instructions. Total RNA was eluted in a volume of 30 µL nuclease-free water. Extracted RNA was quantified on Nanodrop. Each reaction contained 100ng of extracted RNA, 1X TaqPath™ 1-Step RT-qPCR Master Mix, CG (ThermoFisher), the CDC N1 forward and reverse primers, and probe.<sup>13</sup>

### *SARS-CoV-2 whole viral sequencing, assembly, and phylogenetic analysis*

cDNA synthesis was performed using Superscript IV reverse transcriptase (Invitrogen, Waltham, MA, USA). Whole viral amplification was performed using two amplification strategies to rule out PCR artifacts: 1) the Artic protocol using multiplexed primer pools designed with Primal Scheme generating 400-bp tiling amplicons<sup>17,18</sup> and 2) a 20-amplicon strategy using nested PCR amplification with primer sets generating an amplicon sizes of 1.5-2kb. PCR products from the Artic and 20-amplicon strategies were pooled separately and Illumina library construction was performed using the Nextera XT Library Prep Kit (Illumina, San Diego, CA, USA). Sequence reads were assembled by a customized SARS-CoV-2 module (<https://github.com/XuetingQiu/ViralAssembly>) within Iterative Refinement Meta-Assembler (IRMA v0.9.3, <https://wonder.cdc.gov/amd/flu/irma/>), which is designed for highly variable RNA viruses with more robust assembly and variant calling.<sup>19</sup> The SARS-CoV-2 module was created with the generation of a consensus template and reference profile from publicly available whole genome sequences deposited in GISAID (<https://www.gisaid.org/>).<sup>12</sup> The minimum variant calling frequency was set to be 5% to identify within-

host variations. The resulting DNA libraries were sequenced with the MiSeq instrument (Illumina, San Diego, CA, USA). The comparison dataset included 167 representative SARS-CoV-2 genomes randomly selected from GISAID (Table S6) by regions of interest (Massachusetts, United States, and globally). Furthermore, a representative local viral population containing 552 isolates from Massachusetts and other New England areas (Table S7) was used to provide a higher resolution of potential local clustering. Nucleotide sequence alignment was performed with MAFFT (multiple alignment using fast Fourier transform).<sup>20</sup> Best-fit nucleotide substitution GTR+G+I was used for the datasets using model selection in IQ-Tree followed by maximum likelihood phylogenetic tree construction using IQ-Tree web server with 1000-bootstrap replicates.<sup>21</sup>

#### *SARS-CoV-2 viral infectivity studies*

The NP specimens on Days 75 and 143 were thawed on ice and filtered through 0.45 µm Spin-X centrifuge filters (Sigma) at 10,000xg at 4°C for 10 minutes. The filtrate was then diluted 1:10 in D<sup>+</sup> (DMEM (Fisher) supplemented with Penicillin/Streptomycin (Fisher) and Hepes buffer (Fisher)). 200 µL of the diluted samples were added to 150,000 Vero-E6 cells (ATCC) in a 12-well plate. D<sup>+</sup> was used as a non-infected control and USA-WA1 (BEI Resources) as positive control.<sup>22</sup> Each condition was tested in duplicate. The plate was then incubated for 1 hour at 37°C on a platform rocker. After 1 hour, the inoculum was removed and 2 mL of fresh media was added (D<sup>+</sup> supplemented with 2% FBS(Sigma)) and the plate returned to 37°C. Wells were observed at 24, 48, 72, and 96 hours post infection for cytopathic effect. Negative controls contained no virus. Positive controls contained NR-52281 SARS-Related Coronavirus 2, Isolate USA-WA1/2020. Pictures taken on a Evos XL Core imaging system (Invitrogen) at 4x magnification.

#### *Immunophenotyping by flow cytometry*

Immunophenotyping was performed on 1 million cryopreserved peripheral blood mononuclear cells (PBMCs) that were freshly isolated on Day 81 (after thawing) and freshly isolated PBMC from age-matched (40 to 60 years old) patients with active Covid-19 (Table S4). Prior to antibody staining, Fc receptors were blocked using human FcR blocking reagent (Miltenyi, Bergisch Gladbach, Germany) at a concentration of 1:50 at 4°C for 10 minutes. Cells were surface stained at 4°C, protected from light, using optimized concentrations of fluorochrome-conjugated primary antibodies for 30 minutes as well as live/dead fixable blue stain (Thermo Fisher, Waltham, MA, USA) at a concentration of 1:20 using the following panel of antibodies (clone, manufacturer): CD3 (UCHT1, BD Biosciences), CD4 (SK3, BD Bioscience), CD8 (RPA-T8, BD Bioscience), CD11c (Bu15, BD Bioscience), CD14 (M5E2, BioLegend), CD16 (3G8, BD Bioscience), CD19 (SJ25C1, BioLegend), CD25 (2A3, BD Bioscience), CD27 (L128, BD Biosciences), CD38 (HB-7, BioLegend; HIT2, BD Bioscience), CD45RA (HI100, BD Bioscience), CD56 (NCAM16.2, BD Biosciences), CD57 (NK-1, BD Bioscience), CD62L (DREG-56, Biolegend), CD123 (6H6, Biolegend), CD127 (A019D5, Biolegend), CD138 (MI15, BioLegend), CCR4 (1G1, Biolegend), CCR6 (G034E3, Biolegend), CXCR3 (G025H7, Biolegend), CXCR5 (J252D4, BioLegend; RF8B2 BD Bioscience), CX3CR1 (2A9-1, Biolegend), HLADR (L243, Biolegend), IgD (IA6-2, BD Biosciences), NKG2A (REA110, Miltenyi), NKG2C (134591, BD Bioscience), PD1 (EH12.2H7, BD Bioscience).

Individual cell subsets were defined as the following:

B cell: CD3-CD56-CD19+

mDC: CD3-CD14-CD19-CD56-HLADR+CD11c+CD123low

pDC: CD3-CD14-CD19-CD56-HLADR+CD11c-CD123bright

Monocyte: CD3-CD19-CD56-CD14+

NK: CD3-CD56brtCD16neg/CD3-CD56dimCD16pos/CD3-CD56negCD16pos

CD4 T cell: CD3+CD4+

CD8 T cell: CD3+CD8+

Ab-secreting B cell: CD27+CD38+ (the rest of B cells are non-Ab-secreting)

Plasma cell: CD27+CD38+CD138+

Plasmablast: CD27+CD38+CD138-

Tfh CD4: CXCR3-CXCR5+

Th1 CD4: CXCR3+CXCR5-

Th1Tfh CD4: CXCR3+CXCR5+

Th2 CD4: CXCR3-CXCR5-CCR4+CCR6-



Th17 CD4: CXCR3-CXCR5-CCR4+CCR6+  
Naïve T cell (within CD4 or CD8+ T cells): CD45RA+CD62L+  
Tcm (within CD4 or CD8+ T cells): CD45RA-CD62L+  
Tem (within CD4 or CD8+ T cells): CD45RA-CD62L-  
Temra (within CD4 or CD8+ T cells): CD45RA+CD62L-

Cells were then washed in phosphate-buffered saline (PBS) and fixed with 4% paraformaldehyde for 30 minutes at 4°C. Flow cytometry was performed on a BD Symphony (BD Biosciences, San Jose, CA), and rainbow tracking beads (8 peaks calibration beads, Fisher) were used to ensure consistent signals between flow cytometry batches. FCS files were analyzed, and subsets of immune cells were quantified using FlowJo software (version 10.7.1). Assembly of quantified cell subsets was performed in GraphPad Prism (version 8.4.3).

Immune profile of the study subject was presented with data from additional 11 freshly isolated peripheral blood samples, drawn from inpatients with Covid-19 at Massachusetts General Hospital. This study was performed with the approval of the Institutional Review Boards at Mass General Brigham.

#### *CD4+ and CD8+ T cell Proliferation Assay*

SARS-CoV-2-specific T cell proliferation was performed on peripheral blood mononuclear cells (PBMCs) on Day 81. PBMCs from the patient were collected by Ficoll gradient separation from acid citrate dextrose (ACD) tubes. PBMCs were suspended at  $1 \times 10^6$ /mL in phosphate buffered saline (PBS) and incubated at 37°C for 20 minutes with 0.5  $\mu$ M carboxyfluorescein succinimidyl ester (CFSE; Life Technologies). After the addition of serum and washes with PBS, cells were resuspended at  $1 \times 10^6$ /mL and plated into 96-well U-bottom plates (Corning) at 200  $\mu$ L volumes. SARS-CoV-2 peptide pools (JPT, Berlin, Germany) for non-structural proteins (NSP5, NSP6, NSP7, NSP8, NSP9, NSP12, NSP15), Spike protein, and other structural proteins (Nucleocapsid, Membrane, Envelope and ORF3A) were added at a final concentration of 1  $\mu$ g/mL. On day 6, cells were harvested, washed with PBS + 2% fetal bovine serum, and stained with Alexa Fluor 700 mouse anti-human CD3 antibody (1:200; clone OKT3; BioLegend), APC mouse anti-human CD8 antibody (1:200; clone RPA-T8; BioLegend), PE-Cy7 mouse anti-human CD4 antibody (1:200; clone RPA-T4; BioLegend) and LIVE/DEAD violet viability dye (1:1000; Life Technologies). Cells were washed and fixed in 2% paraformaldehyde, prior to flow cytometric analysis using a BD LSR II (BD Biosciences). Flow cytometric data were analyzed using FlowJo software (v10.1r5).

#### *Quantitative SARS-CoV-2-specific antibodies*

Epitope Diagnostics EDI Novel Coronavirus COVID-19 IgM and IgG Enzyme Linked Immunosorbent Assays (ELISA) were performed as per manufacturer instructions (Epitope Diagnostics, San Diego, CA). Roche Elecsys was performed as per manufacturer instructions (Roche, Basel, Switzerland).

#### *SARS-CoV-2-specific neutralizing antibody assay*

Neutralizing activity against SARS-CoV-2 pseudovirus was measured using a single-round infection assay in human ACE2 expressing target cells. Pseudotyped virus particles were produced in 293T/17 cells (American Type Culture Collection) by co-transfection of plasmids encoding codon-optimized SARS-CoV-2 full-length Spike (containing G at position 614), packaging plasmid pCMV  $\Delta$ R8.2 expressing HIV-1 gag and pol, and luciferase reporter plasmid pHR' CMV-Luc. Plasmids were kindly provided by Dr. Barney Graham (NIH, Vaccine Research Center). This pseudovirus strain was used for infecting 293/ACE2 target cells. A second pseudovirus strain was produced in 293T/17 cells by co-transfection of plasmids encoding codon-optimized Spike (containing D at position 614) with a deleted cytoplasmic tail (provided by Dr. Dan Barouch, Beth Israel Deaconess Medical Center), and the HIV-1 backbone vector SG3 $\Delta$ Env (NIH AIDS Reagent Program). This pseudovirus strain was used for infecting TZM.bl/ACE2 target cells which encode an integrated luciferase reporter gene under control of an HIV-1 LTR. The 293T and TZM.bl cell lines stably overexpressing the human ACE2 cell surface receptor protein were kindly provided by Drs. Michael Farzan and Huihui Ma (The Scripps Research Institute). For neutralization assays, serial dilutions of patient serum samples were performed in duplicate followed by addition of pseudovirus. Plates were incubated for 1 hour at 37°C followed by addition of 293T/ACE2 or TZM.bl/ACE2 target cells ( $1 \times 10^4$ /well). Wells containing cells + pseudovirus (without sample) or cells alone acted as positive and negative infection controls, respectively. Assays were harvested on day 3 using Promega Bright-Glo luciferase reagent and luminescence detected with a Perkin-

Elmer Victor luminometer. Titers were determined as the serum dilution that inhibited 50% or 80% virus infection (ID<sub>50</sub> and ID<sub>80</sub> titers, respectively).

*SARS-CoV-2-specific antibody isotype and subclass analysis via Luminex*

Antigen-specific antibody isotype and subclass were evaluated using a previously-described 384-well based customized Luminex assay.<sup>23</sup> Antibody was evaluated longitudinally using serum samples collected on days 31, 59, 73, 77, 81, 83, 87, 131, 133, 146, and 152. The Luminex assay is sample-sparing and amenable to multiplex format, so samples were run in duplicate in a multiplex plate format. Relative antibody concentration was measured against a panel of SARS-CoV-2 antigens. Fluorescent carboxyl-modified microspheres (Luminex) were coupled with different antigens: SARS-CoV-2 spike protein (S) (kindly provided by Bing Chen), SARS-CoV-2 receptor binding domain (RBD) (kindly provided by Aaron Schmidt), SARS-CoV-2 nucleocapsid protein (N) (Aalto Bio Reagents), and recombinant ebolavirus glycoprotein (negative control, Recombinant EBOV GPDTM (mammalian), IBT Bioservices, 0501-001). Luminex bead regions were coupled via covalent NHS-ester linkages utilizing EDC [1-ethyl-3-(3-dimethylaminopropyl) carbodiimide hydrochloride] (Thermo Scientific) and sulfo-NHS (Thermo Scientific) according to the manufacturer's instructions. Antigen-coated microspheres ( $1.2 \times 10^3$  per Luminex region) were added in Luminex assay buffer containing 0.1% bovine serum albumin (BSA) and 0.05% Tween 20 in a 384-well plate (Greiner Bio-one). Five microliters of diluted plasma samples or phosphate-buffered saline (PBS) for background assessment (IgG<sub>1</sub> at 1:500 dilution, other subclasses/isotypes at 1:100) was added in duplicate and incubated with antigen-coated microspheres for 12 h at 4°C while rocking at 900 rpm. The immune-complexed microspheres were washed with an automated plate washer (Tecan). Secondary phycoerythrin (PE)-coupled IgG1-, IgA1-, or IgM-specific detection reagents (Southern Biotech) were added at 1.3 µg/ml in Luminex assay buffer and incubated for 1 h at room temperature while shaking at 900 rpm. The coated beads were washed and read using flow cytometry on an iQue Screener (Intellicyt) with a robotic arm (PAA). Analysis was performed using ForeCyt software to gate on fluorescent bead regions and PE median fluorescent intensity (MFI) which is the reported readout for these relative antibody titers. Samples were run concurrently with convalescent patient serum samples with known high antibody titers and known low/negative antibody titers as controls.

## SUPPLEMENTAL FIGURES

**Figure S1:** Clinical course and immunosuppression

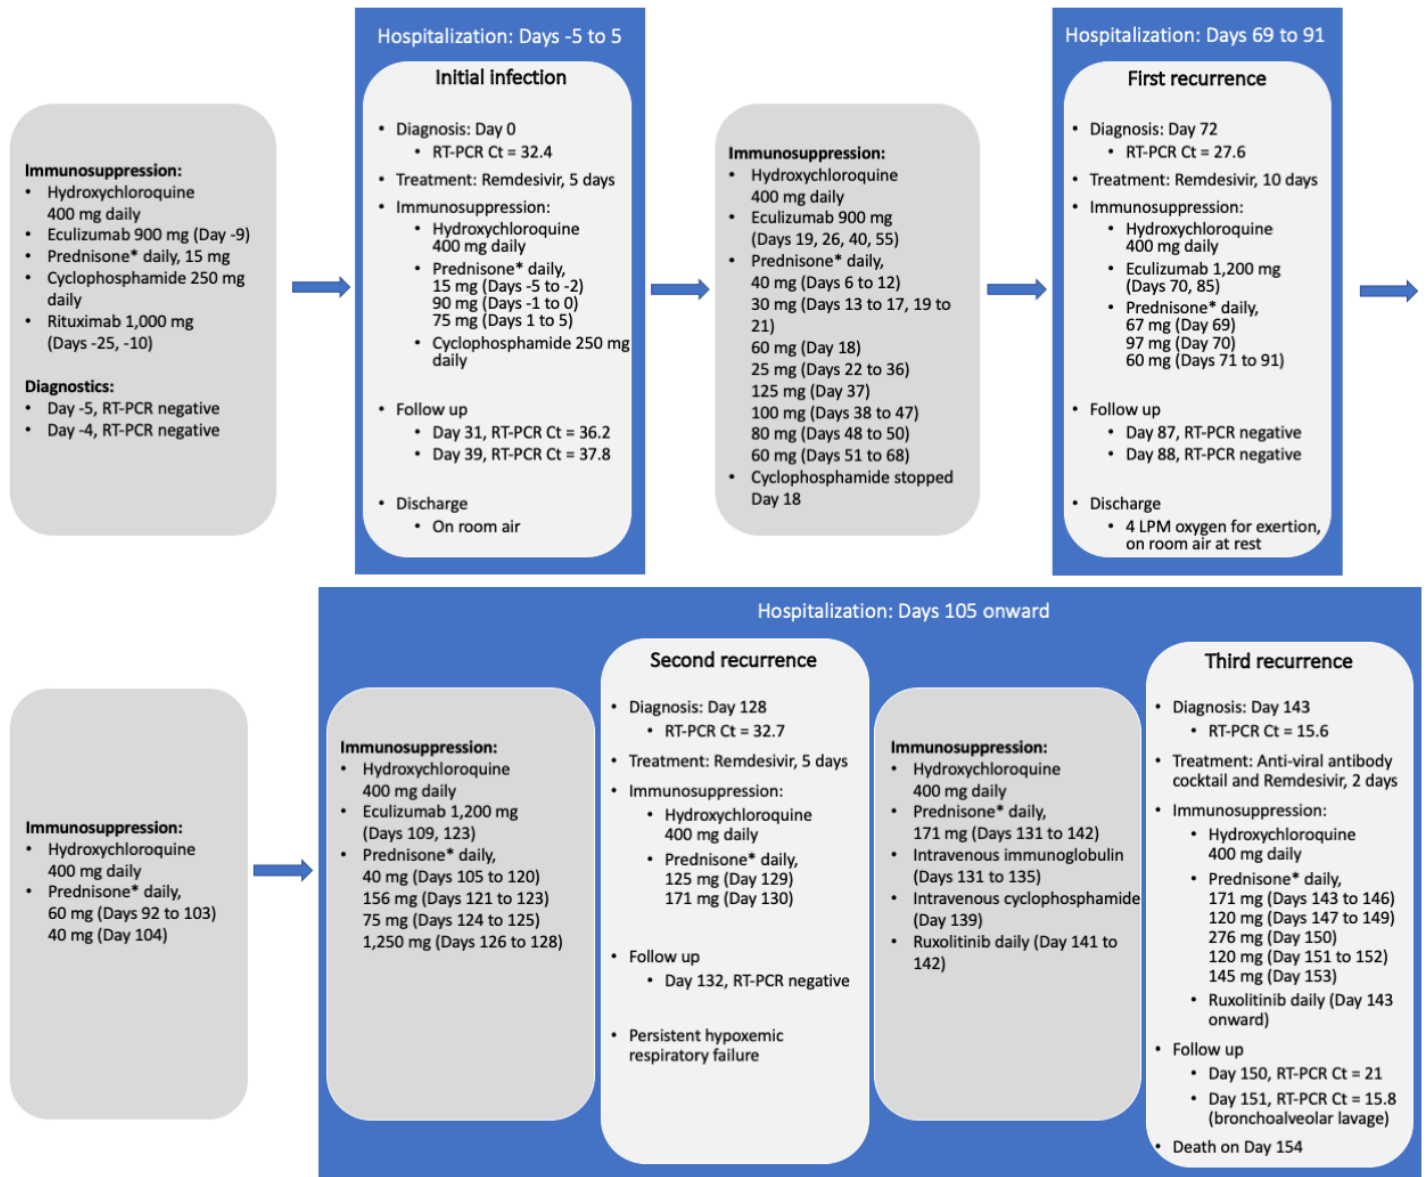

\* Or equivalent daily dose of methylprednisolone, dexamethasone, or combination

**Figure S2:** Levels of SARS-CoV-2 viral RNA and time course of immunosuppressive and antiviral treatments. *Top panel:* Nasopharyngeal and bronchoalveolar lavage SARS-CoV-2 RT-PCR cycle threshold (Ct) values (dashed line represents cutoff for positivity at 40) and SARS-CoV-2 antibody testing. Day 0 represents day of first positive SARS-CoV-2 nasopharyngeal swab RT-PCR. Prior nasopharyngeal swab RT-PCR from Days -5 and -4 were negative. *Middle panel:* SARS-CoV-2 RNA viral loads in nasopharyngeal, plasma, and sputum by quantitative RT-PCR assay. Viral load not obtained on Day 132, the day of negative RT-PCR before third recurrence. *Bottom panel:* Immunosuppressive and antiviral treatments.

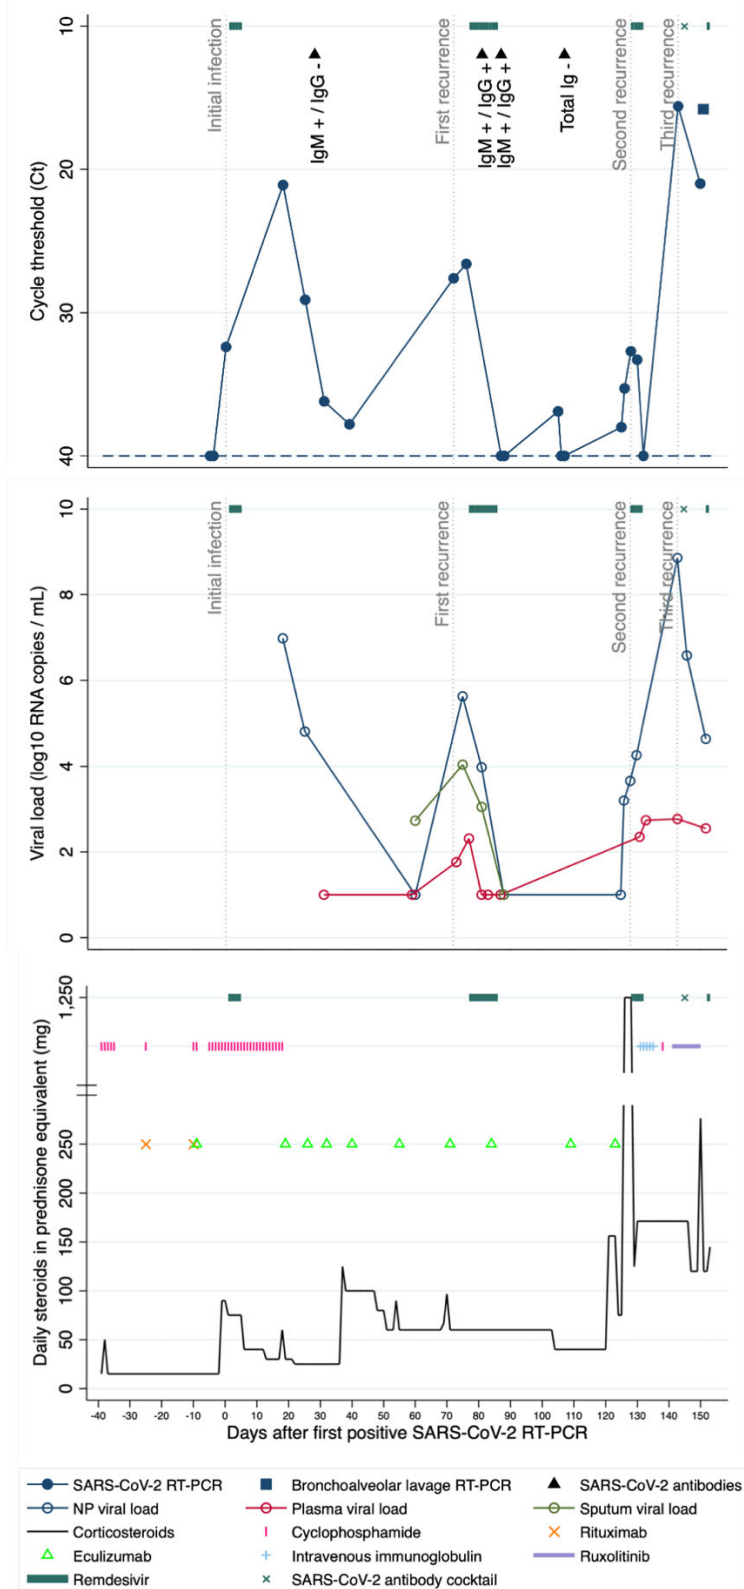

**Figure S3:** Representative computed tomography (CT) chest images at the level of the right lower lobe bronchus. (A) Day -38. CT without contrast obtained 38 days prior to initial positive RT-PCR swab. (B) Day -1. CT pulmonary angiogram obtained 1 day prior to first positive RT-PCR swab diagnosing Covid-19. Notable for multifocal patchy groundglass opacities with peribronchial distribution and subpleural sparing. Negative for pulmonary embolism. (C) Day 76. CT pulmonary angiogram obtained 4 days after diagnosis of first recurrence of Covid-19. Notable for new peribronchial and subpleural GGOs, reticulation admixed with consolidation and architectural distortion, mild traction bronchiectasis. Negative for pulmonary embolism. (D) Day 111. CT pulmonary angiogram obtained during admission for cellulitis, on day of escalating oxygen requirement. This was 15 days before diagnosis of second recurrence of Covid-19. Notable for worse bilateral patchy GGO and solid opacities. Negative for pulmonary embolism. (E) Day 124. CT pulmonary angiogram obtained due to worsening hypoxemia. This was 2 days before diagnosis of second recurrence of Covid-19. Notable for extensive bilateral GGO with patchy areas of lobular and subpleural sparing, worsening diffuse lung disease with evidence of organization. Negative for pulmonary embolism.

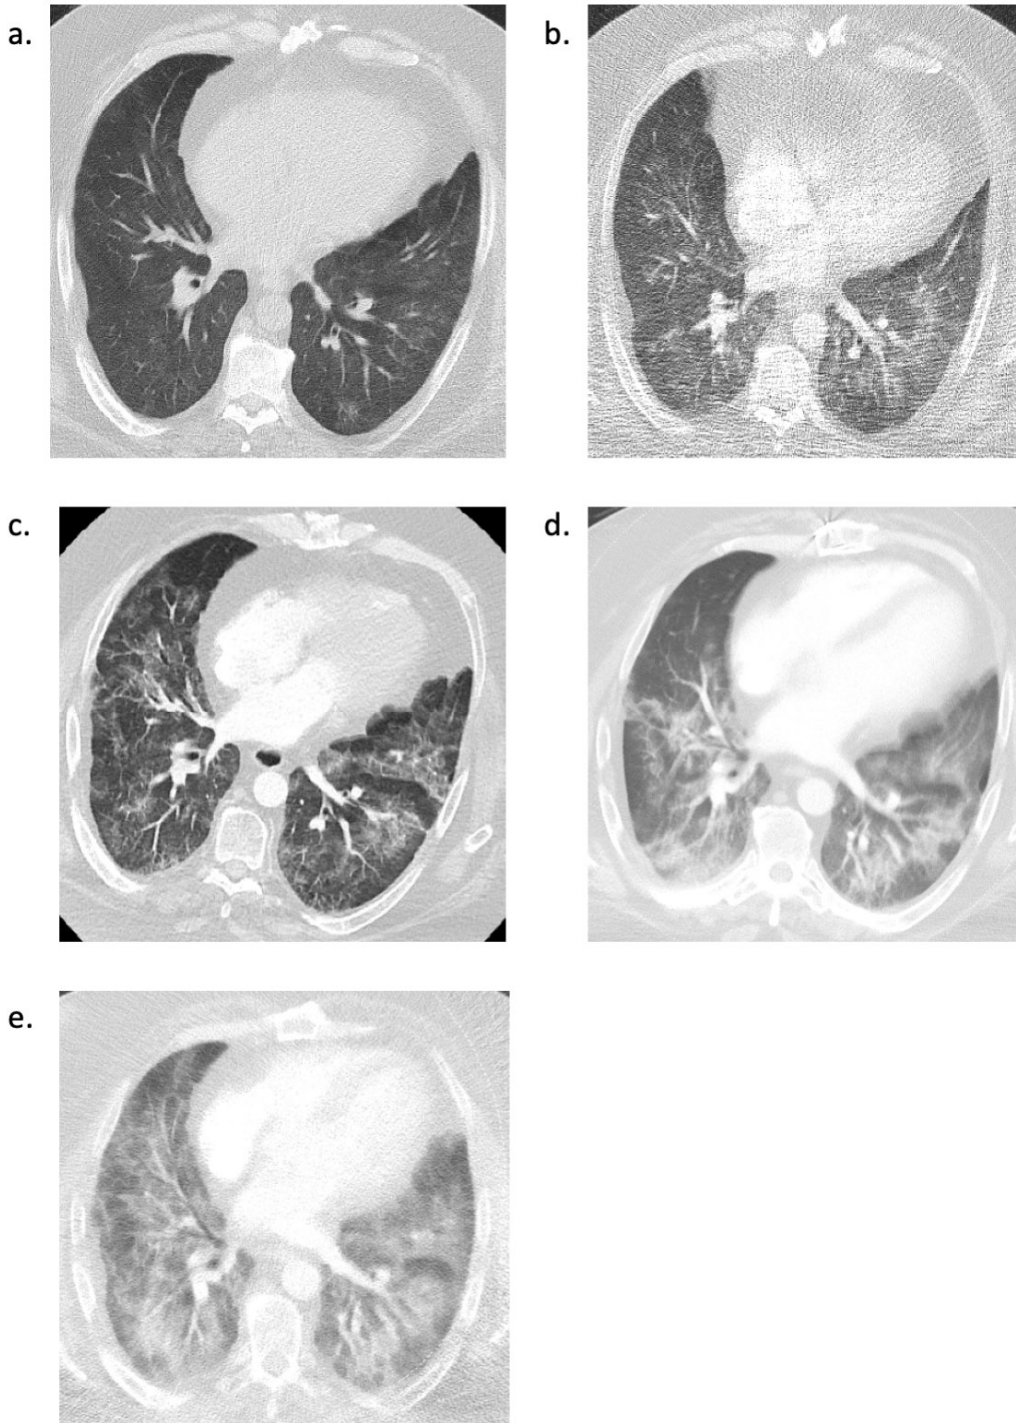

**Figure S4:** SARS-CoV-2 RNA viral loads and total viral burden from post-mortem exam, by tissue type.

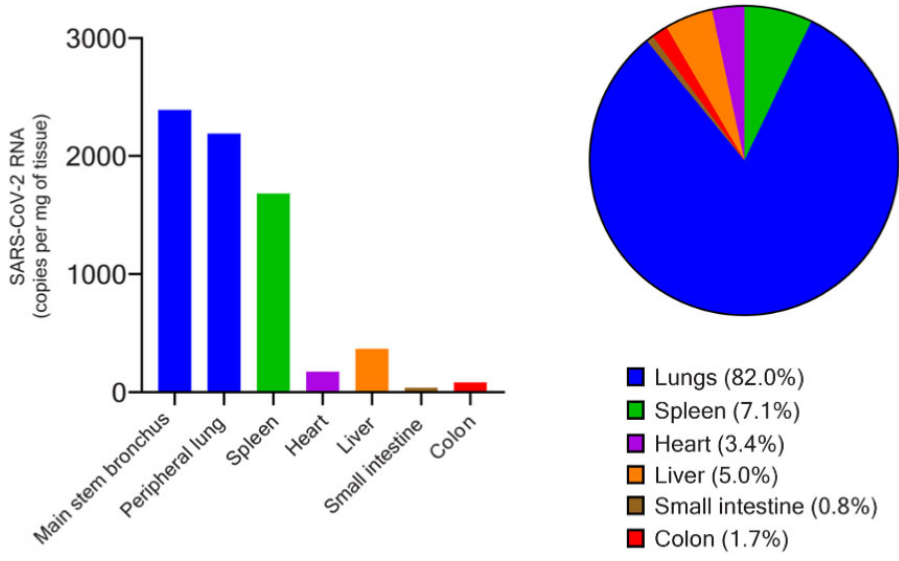

**Figure S5:** Gross exam and histology from autopsy. *Top left:* Gross photograph of left lung at autopsy showing diffuse alveolar hemorrhage and necrotizing *Aspergillus* pneumonia including a left upper lobe cavitory nodule (arrow). *Top right:* Diffuse alveolar hemorrhage with fresh blood in alveolar spaces as well as abundant hemosiderin-laden macrophages (arrows) indicative of prior episodes. Hematoxylin and eosin (H&E) stained section, 100x original magnification. *Bottom left:* Lymph node with extensive depletion of lymphoid cells including absence of germinal centers. H&E stained section, 20x original magnification. *Bottom right:* Necrotizing *Aspergillus* pneumonia with abundant organisms (arrows). H&E stained section, 200x original magnification.

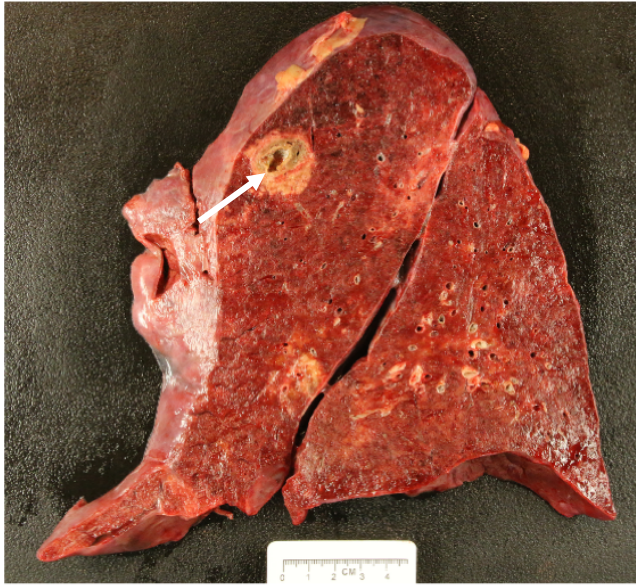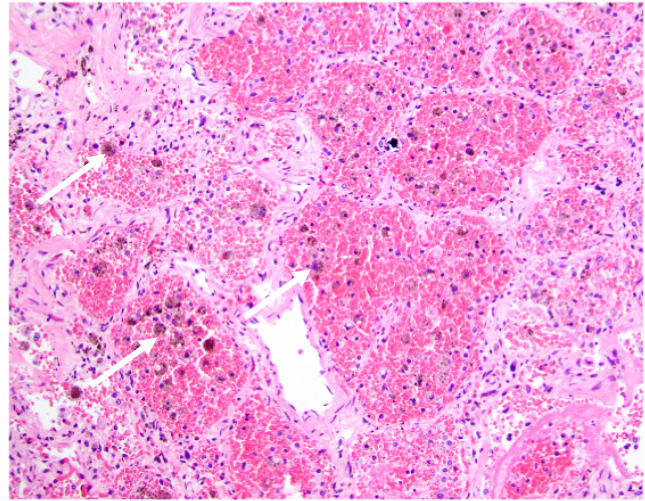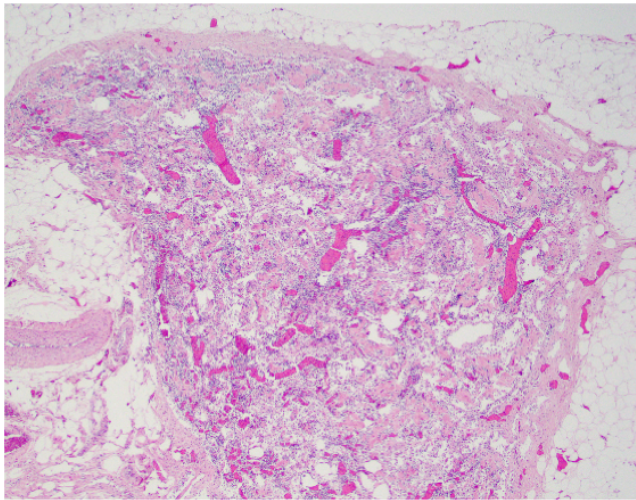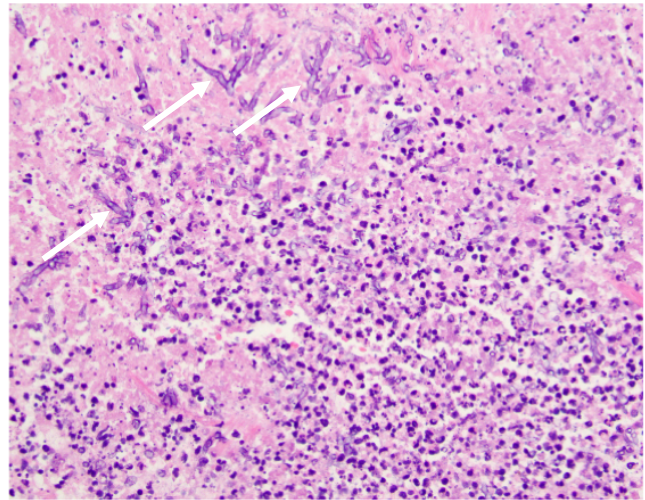

**Figure S6:** Maximum likelihood phylogenetic tree with patient sequences (red) at three time points, T0 (Day 18, 25), T1 (Day 75, 81), T2 (Day 128, 130), and T3 (Days 143, 146, 152) compared to representative sequences from the state (Massachusetts) and region (Other New England Area).

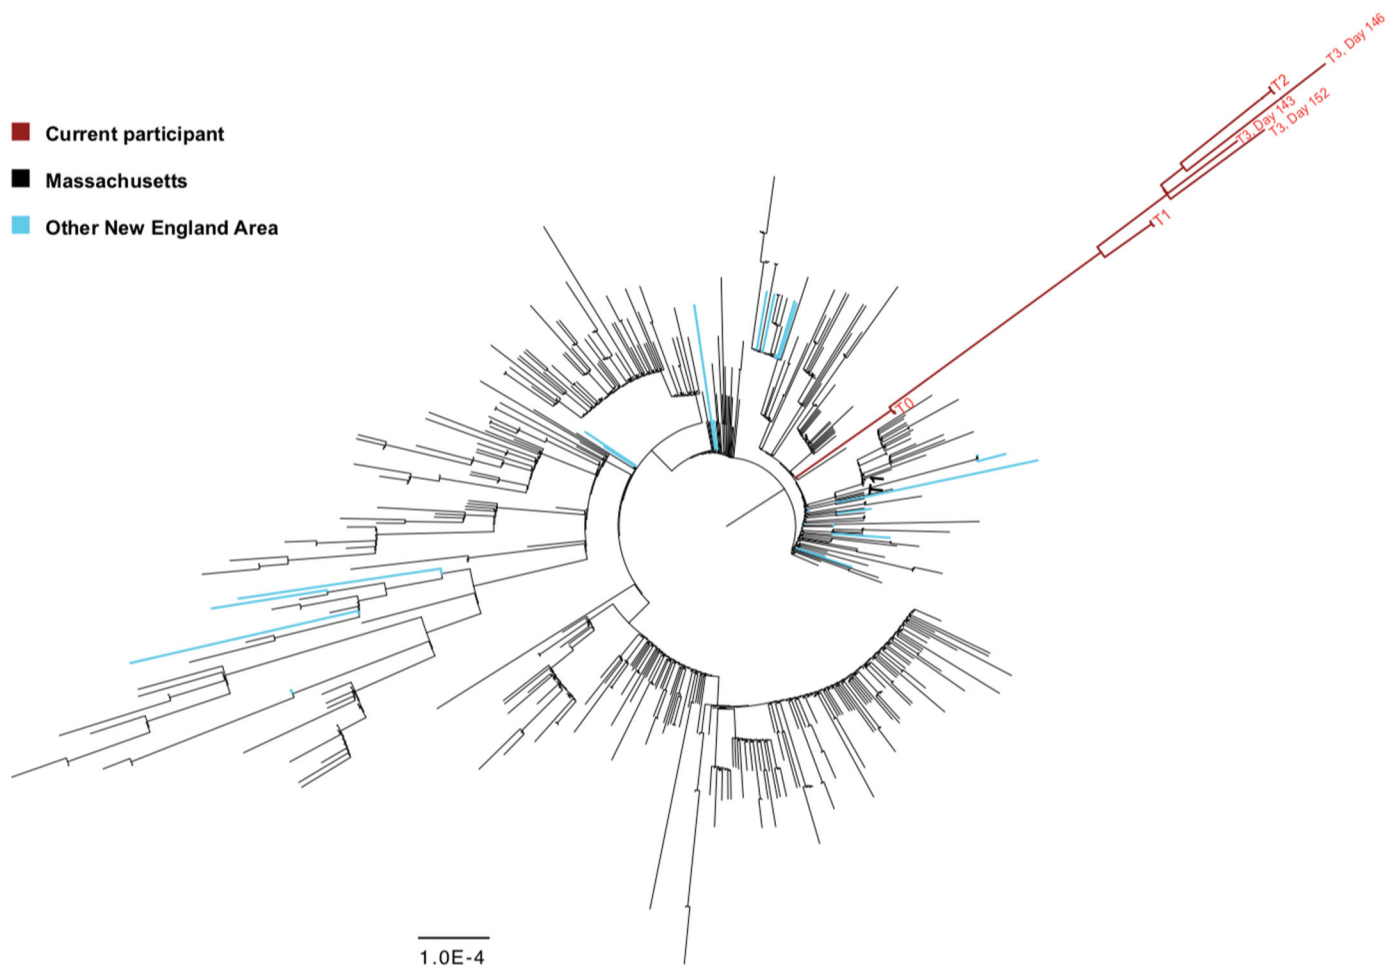



**Figure S7:** Viral infectivity studies. Epithelial cells (Vero-E6) incubated with nasopharyngeal samples from Days 75 and 143 shown at 96 hours post-infection (hpi), demonstrating SARS-CoV-2 cytopathic effects (CPE) and disrupted cell monolayer. 4x magnification. *Top left:* negative control, no virus, with intact monolayer. *Top right:* positive control, USA-WA1/2020, with disrupted monolayer. *Bottom left:* Day 75 sample, with disrupted monolayer. *Bottom right:* Day 143 sample, CPE and disrupted monolayer.

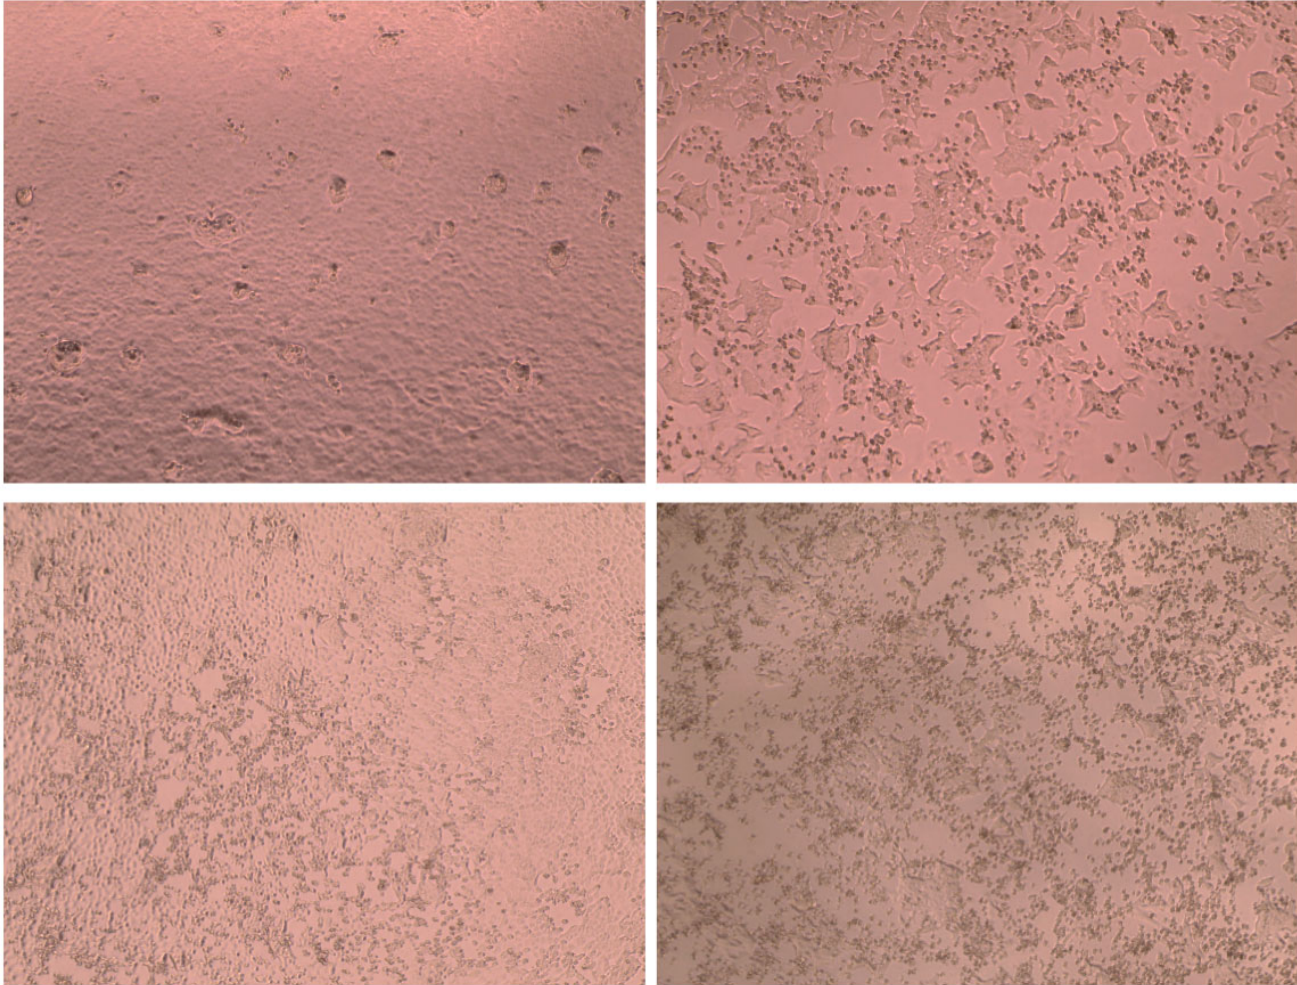

**Figure S8:** Cell surface immune phenotyping by flow cytometry. Dot plots demonstrate the proportion of circulating immune cell types of age-matched hospitalized patients with active Covid-19 (n=12). Demographic information of the controls in Table S4. Each dot represents an individual patient; this patient labeled in red. Data presented with median and 95% confidence intervals. mDC = myeloid dendritic cells, pDC = plasmacytoid dendritic cells, NK = natural killer, Ab-scrct = antibody-secreting B cells, Non-Ab-scrct = non-antibody-secreting B cells, SM = switched memory, DN = IgD-CD27 Double negative, USM = unswitched memory, NK = natural killer, pos = positive, neg = negative, brt = bright, PD1 = programmed cell death protein 1, Treg = regulatory T cell, Tcm= central memory T cell, Tem = effector memory T cell, Temra = terminally differentiated effector T cell, Tfh = T follicular helper cell, Th17 = T helper 17.

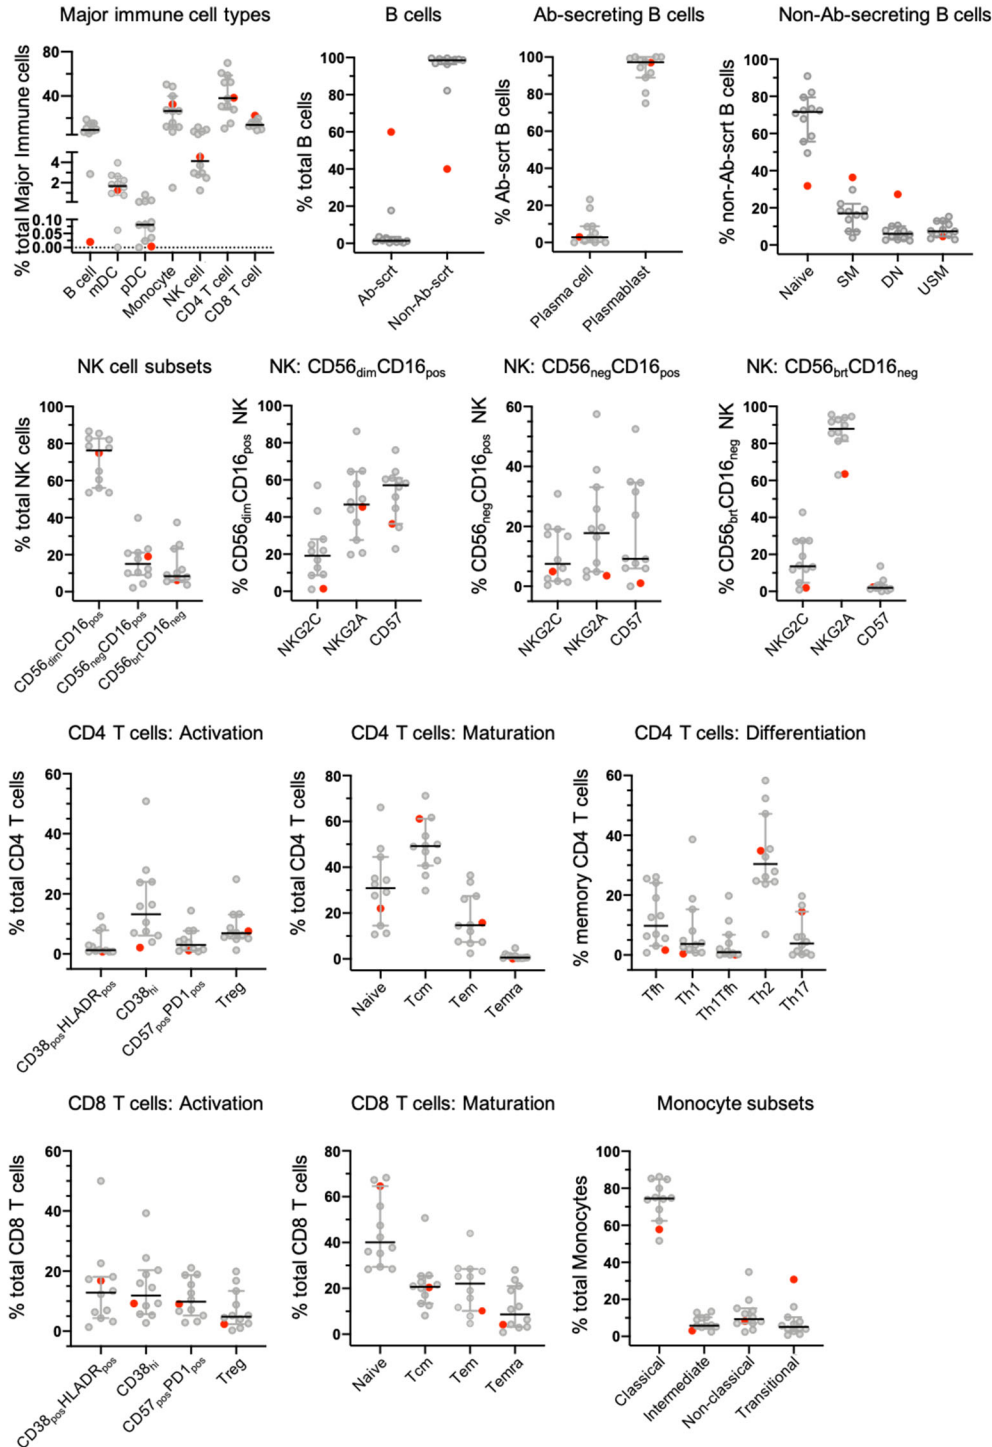

**Figure S9:** SARS-CoV-2-specific CD4 and CD8 T cell proliferation assay. CFSE (carboxyfluorescein diacetate succinimidyl ester) proliferation in response to cytomegalovirus (CMV) and SARS-CoV-2 peptide pools. NSP = non-structural proteins, NC = nucleocapsid, M = membrane, E = envelope, 3a = Open reading frame 3A.

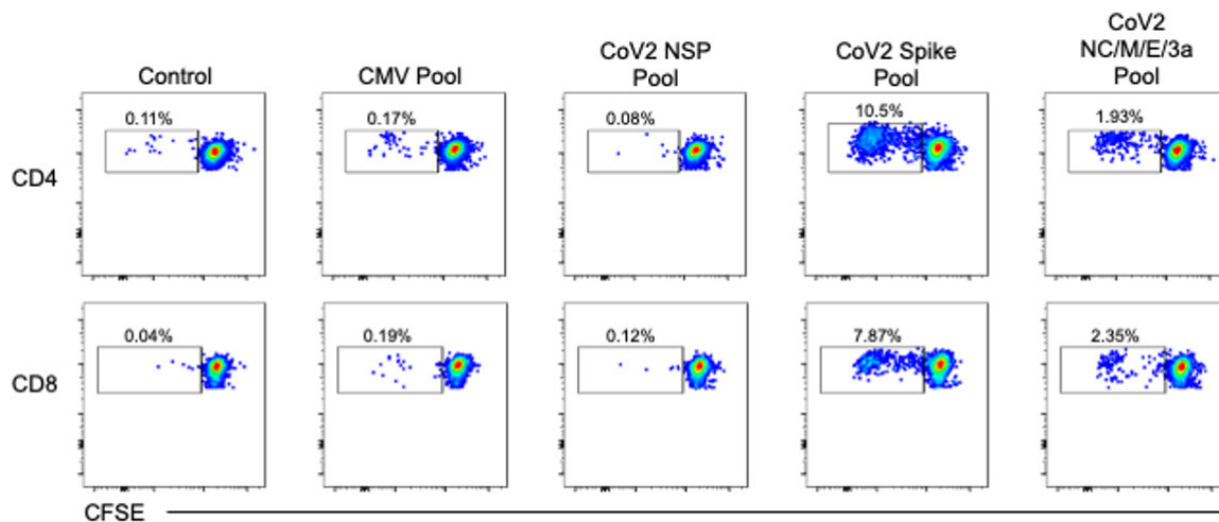

**Figure S10:** Longitudinal serum SARS-CoV-2 antigen-specific antibody isotypes and subclasses (IgG1, IgA1, and IgM) specific for the SARS-CoV-2 spike protein (S), receptor binding domain (RBD), and nucleocapsid protein (N) at timepoints Days 31 – 152 (Days 31, 59, 73, 77, 81, 83, 87, 131, 133, 146, and 152). Antibody titer specific for recombinant HA-tagged Ebolavirus glycoprotein is shown as a negative control. PE median fluorescent intensity (MFI) was the reported readout for relative antibody titers.

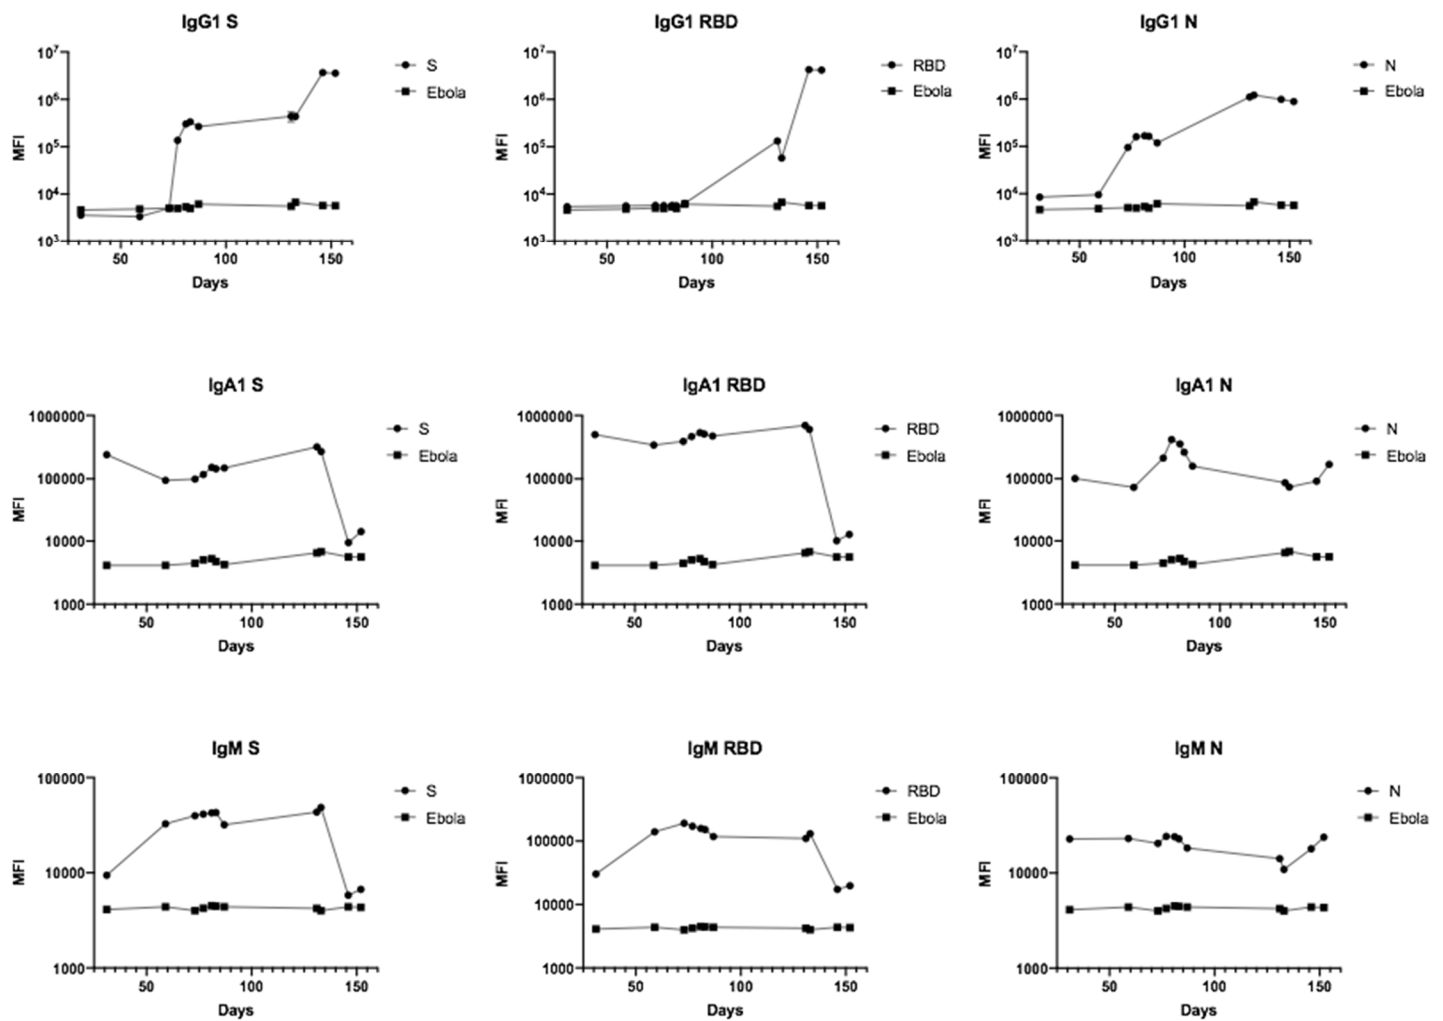

**Figure S11:** Longitudinal serum neutralizing antibody assay at timepoints between Days 31 to 87. Serum inhibitory dilutions at 50% ( $ID_{50}$ ) and 80% ( $ID_{80}$ ) neutralization were attained. Dotted line represents  $ID_{50}$ . *Top panel:* Using VRC7480-G614 full length spike from SARS-CoV-2 pseudovirus and 293T/ACE2 target cells. *Bottom panel:* Using deltaCT-D614 truncated spike from SARS-CoV-2 pseudovirus and T2M.bl/ACE2 target cells. NHS = normal human serum (negative control), Positive Pool Serum = pooled Covid-19 convalescent serum (positive control).

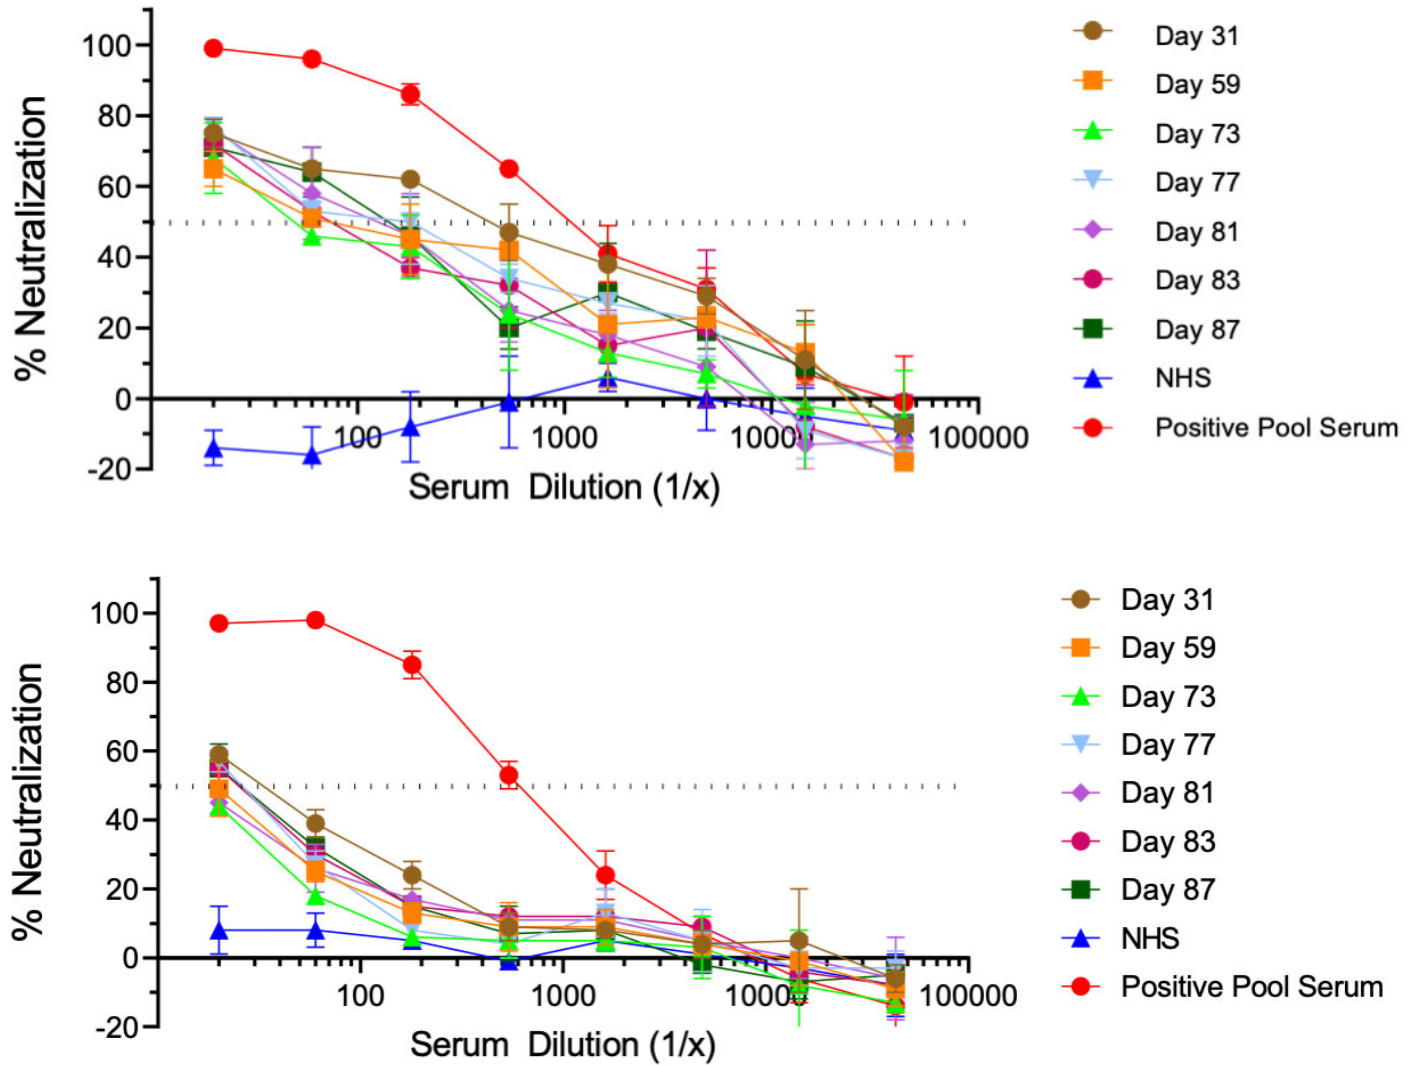

**Figure S12:** Laboratory values over time, Days -40 to 154.

a) Absolute lymphocyte count, b) Lactate dehydrogenase, c) D-dimer, d) C-reactive protein, e) Ferritin, f) Troponin T-hs Gen5

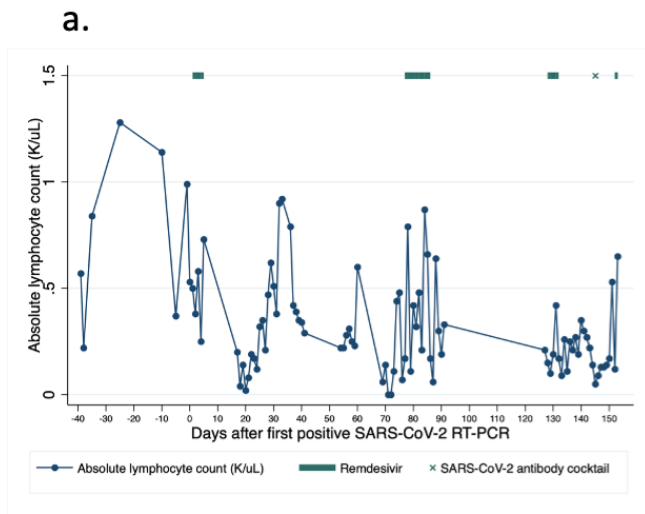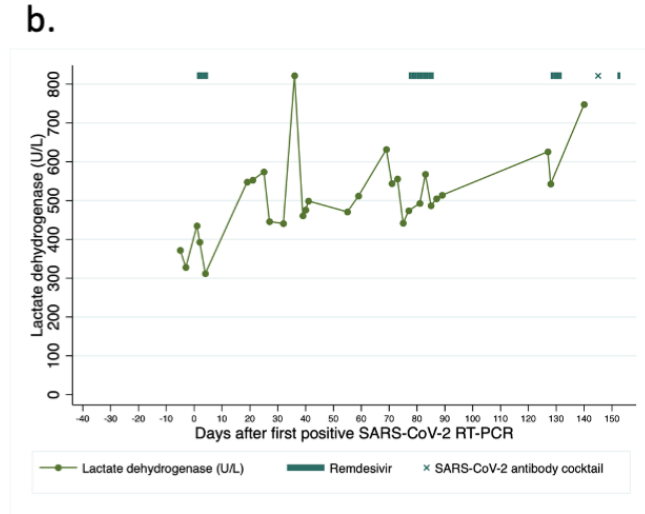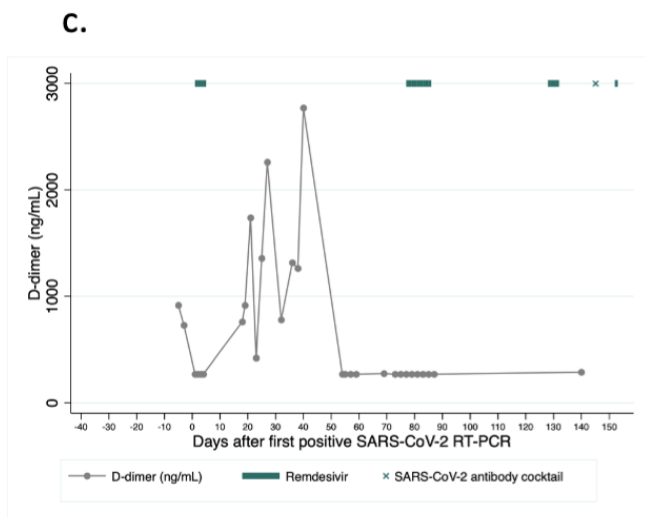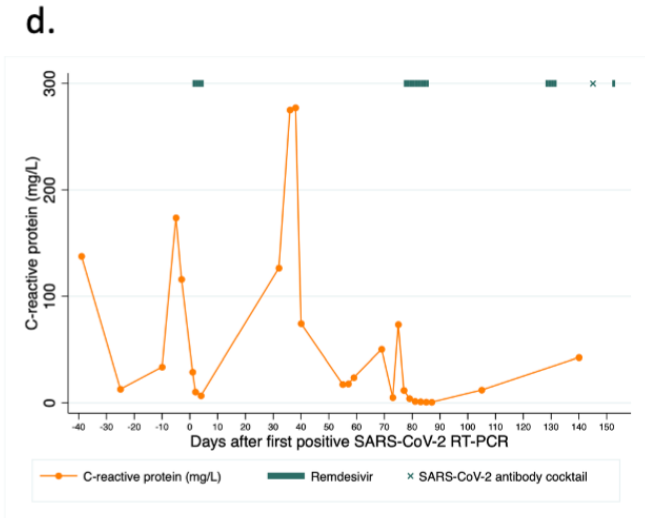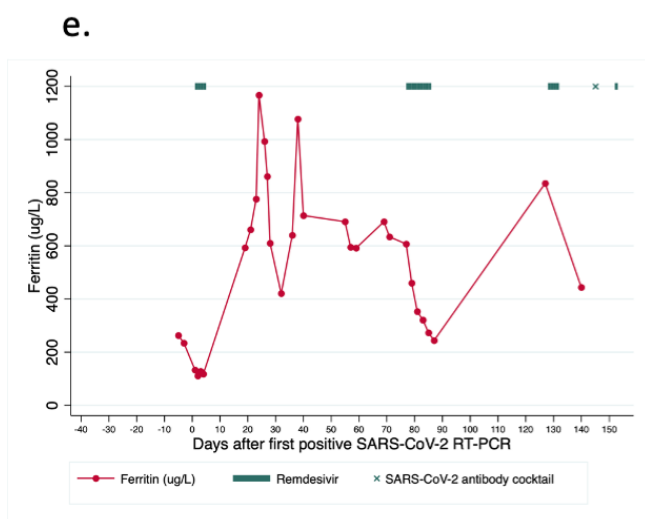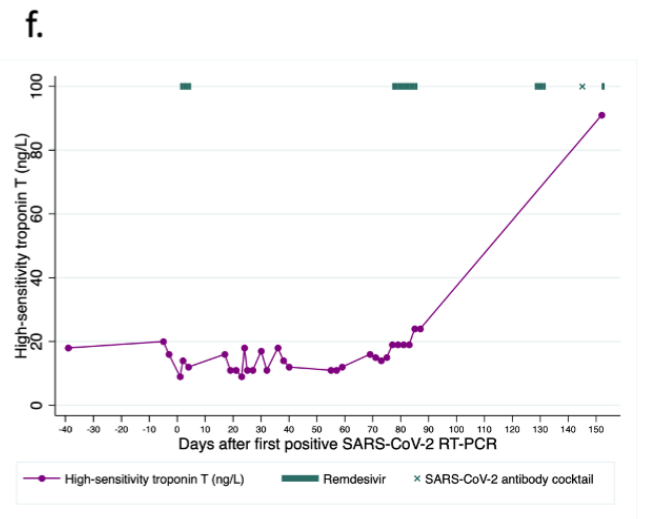

**SUPPLEMENTAL TABLES**

**Table S1:** SARS-CoV-2 RT-PCR Ct and quantitative viral load

| Day | SARS-CoV-2 RT-PCR Ct       | Site | Nasopharyngeal viral load (log <sub>10</sub> RNA copies/mL) | Plasma viral load (log <sub>10</sub> RNA copies/mL) | Sputum viral load (log <sub>10</sub> RNA copies/mL) |
|-----|----------------------------|------|-------------------------------------------------------------|-----------------------------------------------------|-----------------------------------------------------|
| -5  | Negative                   | NP   |                                                             |                                                     |                                                     |
| -4  | Negative                   | NP   |                                                             |                                                     |                                                     |
| 0   | 32.4                       | NP   |                                                             |                                                     |                                                     |
| 18  | 21.2                       | NP   | 6.98                                                        |                                                     |                                                     |
| 25  | 29.1                       | NP   | 4.81                                                        |                                                     |                                                     |
| 31  | 36.2                       | NP   |                                                             | 1                                                   |                                                     |
| 36  | Positive (Ct not reported) | NP   |                                                             |                                                     |                                                     |
| 39  | 37.8                       | NP   |                                                             |                                                     |                                                     |
| 54  |                            |      |                                                             |                                                     |                                                     |
| 59  |                            |      |                                                             | 1                                                   |                                                     |
| 60  |                            |      | 1                                                           |                                                     | 2.73                                                |
| 62  |                            |      |                                                             |                                                     |                                                     |
| 72  | 27.6                       | NP   |                                                             |                                                     |                                                     |
| 73  |                            |      |                                                             | 1.76                                                |                                                     |
| 75  |                            |      | 5.63                                                        |                                                     | 4.04                                                |
| 76  | 26.6                       | NP   |                                                             |                                                     |                                                     |
| 77  |                            |      |                                                             | 2.31                                                |                                                     |
| 81  |                            |      | 3.98                                                        | 1                                                   | 3.05                                                |
| 83  |                            |      |                                                             | 1                                                   |                                                     |
| 87  | Negative                   | NP   |                                                             | 1                                                   |                                                     |
| 88  | Negative                   | NP   | 1                                                           |                                                     | 1                                                   |
| 105 | 36.9                       | NP   |                                                             |                                                     |                                                     |
| 106 | Negative                   | NP   |                                                             |                                                     |                                                     |
| 107 | Negative                   | NP   |                                                             |                                                     |                                                     |
| 125 | 38                         | NP   | 1                                                           |                                                     |                                                     |
| 126 | 35.3                       | NP   | 3.20                                                        |                                                     |                                                     |
| 128 | 32.7                       | NP   | 3.66                                                        |                                                     |                                                     |
| 130 | 33.3                       | NP   | 4.26                                                        |                                                     |                                                     |
| 131 |                            |      |                                                             | 2.35                                                |                                                     |
| 132 | Negative                   | NP   |                                                             |                                                     |                                                     |
| 133 |                            |      |                                                             | 2.74                                                |                                                     |
| 143 | 15.6                       | NP   | 8.86                                                        |                                                     |                                                     |
| 146 |                            |      | 6.58                                                        | 2.77                                                |                                                     |
| 150 | 21                         | NP   |                                                             |                                                     |                                                     |
| 151 | 15.8                       | BAL  |                                                             |                                                     |                                                     |
| 152 |                            |      | 4.64                                                        | 2.55                                                |                                                     |

BAL = bronchoalveolar lavage, Ct = cycle threshold, NP = nasopharyngeal, RT-PCR = reverse-transcriptase polymerase-chain-reaction

**Table S2:** Quantitative SARS-CoV2-specific antibody testing

| <b>Day</b> | <b>Assay</b>                                                                                 | <b>IgM</b>               | <b>IgG</b>                         | <b>Target antigen</b>                |
|------------|----------------------------------------------------------------------------------------------|--------------------------|------------------------------------|--------------------------------------|
| 28         | Epitope Diagnostics EDI Novel Coronavirus COVID-19 Enzyme Linked Immunosorbent Assay (ELISA) | 1.734<br>(cutoff >0.731) | 0.350, negative<br>(cutoff >0.955) | Recombinant nucleocapsid protein (N) |
| 81         | Epitope Diagnostics EDI Novel Coronavirus COVID-19 Enzyme Linked Immunosorbent Assay (ELISA) | 1.444<br>(cutoff >0.999) | 1.917<br>(cutoff >0.999)           | Recombinant nucleocapsid protein (N) |
| 87         | Epitope Diagnostics EDI Novel Coronavirus COVID-19 Enzyme Linked Immunosorbent Assay (ELISA) | 1.049<br>(cutoff >0.999) | 1.414<br>(cutoff >0.999)           | Recombinant nucleocapsid protein (N) |
| <b>Day</b> | <b>Assay</b>                                                                                 | <b>Antibody index</b>    |                                    |                                      |
| 107        | Roche Elecsys assay of total immunoglobulins (IgM, IgG, and IgA)                             | 0.1<br>(cutoff >1.0)     |                                    | Recombinant nucleocapsid protein (N) |



**Table S3:** Resistance mutation profile of different time-point samples of current participant against REGN10933 and REGN10987. Mutations against REGN10933 are highlighted in black, against REGN10987 highlighted in red and against both REGN10987+REGN10933 are highlighted with red, bold, underlined. Sequences with a mutation in that cell is denoted by “x” while polymorphism is written out in the cell.

|             | K417E | <b>K444Q</b> | <b>V445A</b> | Y453F | L455F | F486V | Q493K | <b>H655Y</b> | <b>R682Q</b> | <b>R685S</b> | <b>V687G</b> | G769E |
|-------------|-------|--------------|--------------|-------|-------|-------|-------|--------------|--------------|--------------|--------------|-------|
| T0, Day 18  |       |              |              |       |       |       |       |              |              |              |              |       |
| T0, Day 25  |       |              |              |       |       |       |       |              |              |              |              |       |
| T1, Day 75  |       |              |              |       |       |       |       |              |              |              |              |       |
| T1, Day 81  |       |              |              |       |       |       |       |              |              |              |              |       |
| T2, Day 128 |       |              |              |       |       |       | x     |              |              |              |              |       |
| T2, Day 130 |       |              |              |       |       |       | x     |              |              |              |              |       |
| T3, Day 143 |       |              |              |       |       |       |       |              |              |              |              |       |
| T3, Day 146 |       |              |              |       |       |       | x     |              |              |              |              |       |
| T3, Day 152 |       |              |              |       |       | 486I  |       |              |              |              |              |       |

**Table S4:** Demographic information for the age-matched hospitalized controls with active Covid-19 (n=11) in immune phenotyping by flow cytometry, as shown in Figure S8.

| Gender<br>(M=Male,<br>F=Female) | Race                       | Ethnicity                 | Age | Sample Date<br>(Days since first<br>+ SARS-CoV-2<br>RT-PCR) | Intubated | ICU<br>care | Deceased | Prior<br>immunotherapy | Corticosteroids | Corticosteroid dosing                                                                                                 | Biologics               |
|---------------------------------|----------------------------|---------------------------|-----|-------------------------------------------------------------|-----------|-------------|----------|------------------------|-----------------|-----------------------------------------------------------------------------------------------------------------------|-------------------------|
| M                               | Unknown                    | Hispanic/<br>Latino       | 44  | 11*                                                         | Y         | Y           | N        | No                     | Yes             | Dexamethasone (8-<br>16mg) on Day -1 and<br>Day 11                                                                    | No                      |
| M                               | White                      | Not Hispanic or<br>Latino | 54  | 39                                                          | Y         | Y           | N        | No                     | No              | none                                                                                                                  | No                      |
| M                               | Unknown                    | Hispanic/<br>Latino       | 46  | 19                                                          | Y         | Y           | Y        | No                     | Yes             | Dexamethasone Days 4-<br>13 (10-20mg)                                                                                 | Tocilizumab<br>(Day 0)  |
| M                               | Unknown                    | Not Hispanic or<br>Latino | 57  | 17                                                          | Y         | Y           | N        | No                     | Yes             | Methylprednisolone<br>40mg (Day 16); home<br>fluticasone                                                              | No                      |
| F                               | White                      | Not Hispanic or<br>Latino | 43  | 16                                                          | Y         | Y           | N        | No                     | No              | Home fluticasone                                                                                                      | No                      |
| F                               | Black/<br>African American | Not Hispanic or<br>Latino | 47  | 8                                                           | N         | N           | N        | No                     | Yes             | Prednisone 50mg (Day<br>7); home fluticasone                                                                          | Tocilizumab<br>(Day 7)  |
| M                               | White                      | Not Hispanic or<br>Latino | 60  | 14                                                          | Y         | Y           | N        | No                     | Yes             | Hydrocortisone 50-200<br>mg (Days 5-7);<br>methylprednisolone 20<br>mg (Days 7-8);<br>prednisone 20 mg (Days<br>8-14) | No                      |
| F                               | Unknown                    | Unknown                   | 43  | 41                                                          | Y         | Y           | N        | No                     | No              | Home<br>fluticasone/salmeterol<br>inhaler                                                                             | No                      |
| F                               | Unknown                    | Hispanic/<br>Latino       | 60  | 33                                                          | Y         | Y           | Y        | No                     | No              | none                                                                                                                  | Sarilumab<br>(Day 0)    |
| M                               | Asian                      | Not Hispanic or<br>Latino | 47  | 61                                                          | Y         | Y           | N        | No                     | Yes             | Hydrocortisone 100-<br>150mg (Days 13-14);<br>home fluticasone and<br>mometasone                                      | Anakinra<br>(Days 8-10) |
| F                               | Black/<br>African American | Not Hispanic or<br>Latino | 41  | 12                                                          | Y         | Y           | N        | No                     | Yes             | Methylprednisolone<br>40mg (Day 0)                                                                                    | No                      |

\*May have tested positive days prior at different hospital.

*RT-PCR = reverse transcription polymerase chain reaction*

**Table S5:** Vital signs and laboratory data (day of  $\pm$  3 days)

|                                         | <b>Day 0<br/>(Initial<br/>infection)</b> | <b>Day 72<br/>(First<br/>recurrence)</b> | <b>Day 128<br/>(Second<br/>recurrence)</b> | <b>Day 143<br/>(Third<br/>recurrence)</b> |
|-----------------------------------------|------------------------------------------|------------------------------------------|--------------------------------------------|-------------------------------------------|
| <b>Vital signs</b>                      |                                          |                                          |                                            |                                           |
| Maximum temperature (°Celsius) and mode | 36.4 oral                                | 36.7 oral                                | 37 oral                                    | 36.9 oral                                 |
| Heart rate                              | 74 to 78                                 | 68 to 94                                 | 74 to 92                                   | 86 to 107                                 |
| Cuff blood pressure (mmHg)              | 130/68 to 148/92                         | 121/67 to 166/65                         | 94/65 to 126/89                            | 98/70 to 129/80                           |
| Respiratory rate (breaths/minute)       | 18 to 20                                 | 19 to 22                                 | 17 to 35                                   | 19 to 46                                  |
| SpO2 (%)                                | 92 to 93                                 | 92 to 98                                 | 89 to 97                                   | 87 to 97                                  |
| O2 amount and device required at rest   | None                                     | 3.5 LPM NC                               | 60% to 80%,<br>60 LPM HFNC                 | 75% to 90%,<br>60 LPM HFNC                |
| <b>Laboratory data</b>                  |                                          |                                          |                                            |                                           |
| Total white blood cell count (K/uL)     | 7.11                                     | 5.68                                     | 9.18                                       | 8.61                                      |
| Lymphocyte count (K/uL)                 | 0.53                                     | 0.00                                     | 0.15                                       | 0.22                                      |
| Platelet count (K/uL)                   | 205                                      | 74                                       | 158                                        | 143                                       |
| Hemoglobin (g/dL)                       | 8.8                                      | 10.0                                     | 10.5                                       | 11.5                                      |
| Lactate dehydrogenase (U/L)             | 435                                      | 556                                      | 543                                        | 748                                       |
| D-dimer (ng/mL)                         | <270                                     | <270                                     | -                                          | 289                                       |
| C-reactive protein (mg/L)               | 29.0                                     | 5.1                                      | -                                          | 42.6                                      |
| Serum ferritin ( $\mu$ g/L)             | 133                                      | 634                                      | 835                                        | 444                                       |
| High-sensitivity troponin T (ng/L)      | 9                                        | 14                                       | -                                          | -                                         |
| IL-6 (pg/mL)                            | -                                        | -                                        | -                                          | 7.0                                       |

*HFNC = high flow nasal cannula, LPM = liters per minute, NC = nasal cannula*

**Table S6:** GISAID (<https://www.gisaid.org>) accession numbers

| GISAID Accession Number | Viral Name                                | Collection Date |
|-------------------------|-------------------------------------------|-----------------|
| EPI_ISL_418241          | hCoV-19/Algeria/G0638_2264/2020           | 3/2/20          |
| EPI_ISL_420598          | hCoV-19/Argentina/C3013/2020              | 3/22/20         |
| EPI_ISL_419693          | hCoV-19/Belarus/ChVir2073/2020            | 2020-03         |
| EPI_ISL_414016          | hCoV-19/Brazil/SPBR-05/2020               | 2/29/20         |
| EPI_ISL_414477          | hCoV-19/Czech Republic/951/2020           | 3/1/20          |
| EPI_ISL_416141          | hCoV-19/Denmark/SSI-09/2020               | 3/3/20          |
| EPI_ISL_417418          | hCoV-19/Italy/FVG-ICGEB_S1/2020           | 3/1/20          |
| EPI_ISL_416479          | hCoV-19/Georgia/Tb-273/2020               | 3/5/20          |
| EPI_ISL_416741          | hCoV-19/Lithuania/ChVir1632/2020          | 2020-02         |
| EPI_ISL_414027          | hCoV-19/Scotland/CVR05/2020               | 3/4/20          |
| EPI_ISL_417877          | hCoV-19/Slovakia/SK-BMC1/2020             | 3/6/20          |
| EPI_ISL_419562          | hCoV-19/Luxembourg/LNS0000001/2020        | 2/29/20         |
| EPI_ISL_416756          | hCoV-19/France/Lyon_06531/2020            | 3/6/20          |
| EPI_ISL_417536          | hCoV-19/Iceland/10/2020                   | 3/16/20         |
| EPI_ISL_420795          | hCoV-19/USA/RI_0556/2020                  | 3/1/20          |
| EPI_ISL_419553          | hCoV-19/USA/RI_0520/2020                  | 2/28/20         |
| EPI_ISL_418251          | hCoV-19/Spain/Madrid201105/2020           | 2/25/20         |
| EPI_ISL_418981          | hCoV-19/Belgium/VRAR-030643/2020          | 3/6/20          |
| EPI_ISL_418420          | hCoV-19/France/ARA10170/2020              | 3/17/20         |
| EPI_ISL_418206          | hCoV-19/Senegal/003/2020                  | 2/28/20         |
| EPI_ISL_420791          | hCoV-19/USA/NH_0004/2020                  | 2/29/20         |
| EPI_ISL_421560          | hCoV-19/USA/UT-00035/2020                 | 3/18/20         |
| EPI_ISL_424887          | hCoV-19/USA/RI_0702/2020                  | 3/5/20          |
| EPI_ISL_426435          | hCoV-19/USA/RI_0882/2020                  | 3/9/20          |
| EPI_ISL_416745          | hCoV-19/France/Pollionay_1733/2020        | 3/10/20         |
| EPI_ISL_416489          | hCoV-19/USA/WI-02/2020                    | 3/15/20         |
| EPI_ISL_421653          | hCoV-19/Latvia/0001/2020                  | 3/25/20         |
| EPI_ISL_417948          | hCoV-19/Congo/108/2020                    | 3/19/20         |
| EPI_ISL_421584          | hCoV-19/USA/NJ-NYUMC83/2020               | 3/18/20         |
| EPI_ISL_421389          | hCoV-19/USA/NY-PV08434/2020               | 3/18/20         |
| EPI_ISL_418973          | hCoV-19/USA/NY-NYUMC27/2020               | 3/17/20         |
| EPI_ISL_420205          | hCoV-19/England/SHEF-C034F/2020           | 3/29/20         |
| EPI_ISL_420350          | hCoV-19/Belgium/BDW-030694/2020           | 3/6/20          |
| EPI_ISL_418813          | hCoV-19/Canada/MB_10/2020                 | 3/13/20         |
| EPI_ISL_415129          | hCoV-19/England/20099038206/2020          | 2/29/20         |
| EPI_ISL_412972          | hCoV-19/Mexico/CDMX-InDRE_01/2020         | 2/27/20         |
| EPI_ISL_416428          | hCoV-19/Vietnam/39607/2020                | 3/7/20          |
| EPI_ISL_416430          | hCoV-19/Vietnam/CM295/2020                | 3/6/20          |
| EPI_ISL_420568          | hCoV-19/Italy/6193/2020                   | 3/23/20         |
| EPI_ISL_412912          | hCoV-19/Germany/Baden-Wuerttemberg-1/2020 | 2/25/20         |
| EPI_ISL_419210          | hCoV-19/Israel/ISR_IT0320/2020            | 2020-03         |
| EPI_ISL_421684          | hCoV-19/USA/MN128-MDH128/2020             | 3/16/20         |
| EPI_ISL_420065          | hCoV-19/Estonia/ChVir1982/2020            | 2020-03         |
| EPI_ISL_418263          | hCoV-19/Greece/10/2020                    | 3/18/20         |
| EPI_ISL_415787          | hCoV-19/Peru/010/2020                     | 3/10/20         |

|                |                                         |          |
|----------------|-----------------------------------------|----------|
| EPI_ISL_420899 | hCoV-19/Germany/BAV-V2010492/2020       | 3/11/20  |
| EPI_ISL_418250 | hCoV-19/Spain/Cataluna201396/2020       | 2020     |
| EPI_ISL_417571 | hCoV-19/Iceland/243/2020                | 3/17/20  |
| EPI_ISL_421651 | hCoV-19/Taiwan/225/2020                 | 3/22/20  |
| EPI_ISL_420153 | hCoV-19/Norway/2090/2020                | 3/16/20  |
| EPI_ISL_413020 | hCoV-19/Switzerland/1000477377/2020     | 2/27/20  |
| EPI_ISL_421275 | hCoV-19/Russia/Moscow_PMVL-1/2020       | 3/18/20  |
| EPI_ISL_413556 | hCoV-19/Wales/PHW2/2020                 | 3/4/20   |
| EPI_ISL_418184 | hCoV-19/USA/WI-GMF-00018/2020           | 3/18/20  |
| EPI_ISL_419654 | hCoV-19/Austria/CeMM0001/2020           | 3/3/20   |
| EPI_ISL_416488 | hCoV-19/Poland/PL_P1/2020               | 3/3/20   |
| EPI_ISL_411902 | hCoV-19/Cambodia/0012/2020              | 1/27/20  |
| EPI_ISL_407079 | hCoV-19/Finland/1/2020                  | 1/29/20  |
| EPI_ISL_403962 | hCoV-19/Nonthaburi/61/2020              | 1/8/20   |
| EPI_ISL_413618 | hCoV-19/USA/CruiseA-13/2020             | 2/20/20  |
| EPI_ISL_402125 | hCoV-19/Wuhan-Hu-1/2019                 | 12/31/19 |
| EPI_ISL_410301 | hCoV-19/Nepal/61/2020                   | 1/13/20  |
| EPI_ISL_413617 | hCoV-19/USA/CruiseA-12/2020             | 2/20/20  |
| EPI_ISL_413609 | hCoV-19/USA/CruiseA-4/2020              | 2/21/20  |
| EPI_ISL_410719 | hCoV-19/Singapore/11/2020               | 2/2/20   |
| EPI_ISL_419211 | hCoV-19/Israel/ISR_JP0320/2020          | 2020-03  |
| EPI_ISL_420889 | hCoV-19/Japan/Hu_DP_Kng_19-031/2020     | 2/14/20  |
| EPI_ISL_413619 | hCoV-19/USA/CruiseA-14/2020             | 2/25/20  |
| EPI_ISL_419561 | hCoV-19/USA/TX_2020/2020                | 2/29/20  |
| EPI_ISL_421466 | hCoV-19/Portugal/PT0063/2020            | 3/20/20  |
| EPI_ISL_418379 | hCoV-19/Canada/ON_PHL7512/2020          | 3/13/20  |
| EPI_ISL_413606 | hCoV-19/USA/CruiseA-1/2020              | 2/17/20  |
| EPI_ISL_413851 | hCoV-19/Guangdong/2020XN4373-P0039/2020 | 1/30/20  |
| EPI_ISL_415461 | hCoV-19/Netherlands/Gelderland_1/2020   | 3/10/20  |
| EPI_ISL_416696 | hCoV-19/USA/WA-UW158/2020               | 3/13/20  |
| EPI_ISL_417514 | hCoV-19/USA/WI-22/2020                  | 3/13/20  |
| EPI_ISL_415128 | hCoV-19/Brazil/ES-225/2020              | 2/29/20  |
| EPI_ISL_418582 | hCoV-19/Ireland/22901/2020              | 3/10/20  |
| EPI_ISL_419566 | hCoV-19/Luxembourg/LNS0641910/2020      | 3/5/20   |
| EPI_ISL_417483 | hCoV-19/Norway/1379/2020                | 2/27/20  |
| EPI_ISL_419675 | hCoV-19/Spain/Valencia11/2020           | 3/20/20  |
| EPI_ISL_420541 | hCoV-19/Slovenia/808/2020               | 3/5/20   |
| EPI_ISL_418243 | hCoV-19/Spain/Andalucia201272/2020      | 2/28/20  |
| EPI_ISL_419425 | hCoV-19/Wales/PHWC-24534/2020           | 3/18/20  |
| EPI_ISL_420799 | hCoV-19/Korea/BA-ACH_2604/2020          | 2/27/20  |
| EPI_ISL_420800 | hCoV-19/Korea/BA-ACH_2718/2020          | 2/29/20  |
| EPI_ISL_416605 | hCoV-19/Japan/DP0481/2020               | 2/16/20  |
| EPI_ISL_413557 | hCoV-19/USA/CA-CDPH-UC1/2020            | 2/28/20  |
| EPI_ISL_417175 | hCoV-19/USA/WA-S122/2020                | 3/2/20   |
| EPI_ISL_416466 | hCoV-19/USA/WA-S11/2020                 | 3/3/20   |
| EPI_ISL_417163 | hCoV-19/USA/WA-S110/2020                | 3/5/20   |
| EPI_ISL_416709 | hCoV-19/USA/WA-UW171/2020               | 3/13/20  |

|                |                                            |         |
|----------------|--------------------------------------------|---------|
| EPI_ISL_421690 | hCoV-19/USA/MN134-MDH134/2020              | 3/16/20 |
| EPI_ISL_413931 | hCoV-19/USA/CA-CDPH-UC11/2020              | 3/5/20  |
| EPI_ISL_413523 | hCoV-19/India/1-31/2020                    | 1/31/20 |
| EPI_ISL_414577 | hCoV-19/Chile/Talca-1/2020                 | 3/2/20  |
| EPI_ISL_416314 | hCoV-19/Hong Kong/CUHK1/2020               | 2/7/20  |
| EPI_ISL_417444 | hCoV-19/Pakistan/Gilgit1/2020              | 3/4/20  |
| EPI_ISL_415581 | hCoV-19/Canada/BC_02421/2020               | 3/1/20  |
| EPI_ISL_413490 | hCoV-19/New Zealand/01/2020                | 2/27/20 |
| EPI_ISL_417521 | hCoV-19/Taiwan/CGMH-CGU-08/2020            | 3/10/20 |
| EPI_ISL_421262 | hCoV-19/Nanchang/JX155/2020                | 1/29/20 |
| EPI_ISL_414520 | hCoV-19/Germany/BavPat2/2020               | 3/2/20  |
| EPI_ISL_414476 | hCoV-19/USA/NY1-PV08001/2020               | 2/29/20 |
| EPI_ISL_417918 | hCoV-19/Malaysia/188407/2020               | 3/18/20 |
| EPI_ISL_417917 | hCoV-19/Malaysia/189332/2020               | 3/20/20 |
| EPI_ISL_416432 | hCoV-19/Saudi Arabia/KAIMRC-Alghoribi/2020 | 3/7/20  |
| EPI_ISL_416706 | hCoV-19/USA/WA-UW168/2020                  | 3/13/20 |
| EPI_ISL_421573 | hCoV-19/South Africa/KRISP_0006/2020       | 3/31/20 |
| EPI_ISL_408484 | hCoV-19/Sichuan/IVDC-SC-001/2020           | 1/15/20 |
| EPI_ISL_420024 | hCoV-19/USA/VA-DCLS-0043/2020              | 3/27/20 |
| EPI_ISL_420025 | hCoV-19/USA/VA-DCLS-0044/2020              | 3/27/20 |
| EPI_ISL_414483 | hCoV-19/USA/CruiseA-24/2020                | 2/17/20 |
| EPI_ISL_415661 | hCoV-19/Chile/Santiago_op4d1/2020          | 3/8/20  |
| EPI_ISL_415151 | hCoV-19/USA/NY2-PV08100/2020               | 3/4/20  |
| EPI_ISL_419709 | hCoV-19/Spain/PaisVasco201602/2020         | 3/4/20  |
| EPI_ISL_416348 | hCoV-19/Shanghai/SH0039/2020               | 2/6/20  |
| EPI_ISL_418977 | hCoV-19/USA/NY-NYUMC31/2020                | 3/17/20 |
| EPI_ISL_416541 | hCoV-19/Kuwait/KU09/2020                   | 3/2/20  |
| EPI_ISL_421662 | hCoV-19/India/1073/2020                    | 3/10/20 |
| EPI_ISL_413488 | hCoV-19/Germany/NRW-01/2020                | 2/28/20 |
| EPI_ISL_409067 | hCoV-19/USA/MA1/2020                       | 1/29/20 |
| EPI_ISL_427161 | hCoV-19/USA/CT-UW-3845/2020                | 3/25/20 |
| EPI_ISL_411929 | hCoV-19/South Korea/SNU01/2020             | 2020-01 |
| EPI_ISL_460472 | hCoV-19/USA/MA-MGH-00005/2020              | 3/11/20 |
| EPI_ISL_460221 | hCoV-19/USA/MA-MGH-00187/2020              | 3/26/20 |
| EPI_ISL_460333 | hCoV-19/USA/MA-MGH-00428/2020              | 3/6/20  |
| EPI_ISL_460277 | hCoV-19/USA/MA-MGH-00716/2020              | 4/8/20  |
| EPI_ISL_460278 | hCoV-19/USA/MA-MGH-00715/2020              | 4/8/20  |
| EPI_ISL_460097 | hCoV-19/USA/MA-MGH-00568/2020              | 3/22/20 |
| Pending        | hCoV-19/USA/MA_Mass_JL17/2020              | 4/8/20  |
| Pending        | hCoV-19/USA/MA_BWH_JL155/2020              | 4/23/20 |
| Pending        | hCoV-19/USA/MA_BWH_JL162/2020              | 4/25/20 |
| Pending        | hCoV-19/USA/MA_BWH_JL149/2020              | 4/28/20 |
| Pending        | hCoV-19/USA/MA_BWH_JL154/2020              | 4/23/20 |
| Pending        | hCoV-19/USA/MA_BWH_JL147/2020              | 4/23/20 |
| Pending        | hCoV-19/USA/MA_BWH_JL150/2020              | 4/27/20 |
| Pending        | hCoV-19/USA/MA_BWH_JL159/2020              | 4/23/20 |
| Pending        | hCoV-19/USA/MA_Mass_JL4/2020               | 3/26/20 |

|                |                                     |         |
|----------------|-------------------------------------|---------|
| EPI_ISL_593478 | hCoV-19/USA/MA_Mass_819_T0_428/2020 | 4/28/20 |
| EPI_ISL_593479 | hCoV-19/USA/MA_Mass_819_T0_55/2020  | 5/5/20  |
| Pending        | hCoV-19/USA/MA_BWH_JL161/2020       | 4/23/20 |
| Pending        | hCoV-19/USA/MA_Mass_JL18S/2020      | 4/1/20  |
| Pending        | hCoV-19/USA/MA_Mass_JL170/2020      | 4/8/20  |
| Pending        | hCoV-19/USA/MA_Mass_JL17S/2020      | 4/8/20  |
| Pending        | hCoV-19/USA/MA_Mass_JL26N/2020      | 5/4/20  |
| Pending        | hCoV-19/USA/MA_Mass_JL26O/2020      | 5/4/20  |
| Pending        | hCoV-19/USA/MA_Mass_JL26S/2020      | 5/4/20  |
| Pending        | hCoV-19/USA/MA_BWH_JL164/2020       | 4/25/20 |
| Pending        | hCoV-19/USA/MA_BWH_JL166/2020       | 4/28/20 |
| EPI_ISL_460440 | hCoV-19/USA/MA-MGH-00006/2020       | 3/11/20 |
| EPI_ISL_460318 | hCoV-19/USA/MA-MGH-00674/2020       | 4/5/20  |
| EPI_ISL_460297 | hCoV-19/USA/MA-MGH-00064/2020       | 3/25/20 |
| EPI_ISL_460138 | hCoV-19/USA/MA-MGH-00544/2020       | 3/20/20 |
| EPI_ISL_460098 | hCoV-19/USA/MA-MGH-00277/2020       | 4/1/20  |
| EPI_ISL_460246 | hCoV-19/USA/MA-MGH-00717/2020       | 4/8/20  |
| Pending        | hCoV-19/USA/MA_BWH_JL145/2020       | 4/28/20 |
| EPI_ISL_460455 | hCoV-19/USA/MA-MGH-00250/2020       | 4/6/20  |
| EPI_ISL_460323 | hCoV-19/USA/MA-MGH-00721/2020       | 4/8/20  |
| EPI_ISL_467866 | hCoV-19/USA/MA-QDX-80/2020          | 3/14/20 |
| EPI_ISL_491316 | hCoV-19/USA/MA-UW-633/2020          | 6/27/20 |
| EPI_ISL_491317 | hCoV-19/USA/MA-UW-673/2020          | 6/26/20 |
| EPI_ISL_460130 | hCoV-19/USA/MA-MGH-00706/2020       | 4/7/20  |
| Pending        | hCoV-19/USA/MA_Mass_JL22/2020       | 4/20/20 |
| Pending        | hCoV-19/USA/MA_Mass_JL19/2020       | 4/7/20  |
| Pending        | hCoV-19/IND/GBRC268a/2020           | 7/17/20 |
| Pending        | hCoV-19/USA/MA_Mass_JL20/2020       | 4/15/20 |
| EPI_ISL_593480 | hCoV-19/USA/MA_Mass_819_T1_624/2020 | 6/24/20 |
| EPI_ISL_593553 | hCoV-19/USA/MA_Mass_819_T1_630/2020 | 6/30/20 |
| EPI_ISL_593554 | hCoV-19/USA/MA_Mass_819_T2_816/2020 | 8/16/20 |
| EPI_ISL_593555 | hCoV-19/USA/MA_Mass_819_T2_818/2020 | 8/18/20 |
| EPI_ISL_593556 | hCoV-19/USA/MA_Mass_819_T3_831/2020 | 8/31/20 |
| EPI_ISL_593557 | hCoV-19/USA/MA_Mass_819_T3_93/2020  | 9/3/20  |
| EPI_ISL_593558 | hCoV-19/USA/MA_Mass_819_T3_99/2020  | 9/9/20  |
| EPI_ISL_415152 | hCoV-19/Panama/328677/2020          | 3/6/20  |
| EPI_ISL_424174 | hCoV-19/USA/CT-UW-1365/2020         | 3/13/20 |

**Table S7:** NCBI (<https://www.ncbi.nlm.nih.gov/nucleotide/?term=>) accession numbers

| Accession Number | Viral Name        | Collection Date |
|------------------|-------------------|-----------------|
| MT520172         | MA_MGH_00568/2020 | 3/22/20         |
| MT520173         | MA_MGH_00277/2020 | 4/1/20          |
| MT520175         | MA_MGH_00278/2020 | 4/1/20          |
| MT520176         | MA_MGH_00016/2020 | 3/25/20         |
| MT520177         | MA_MGH_00018/2020 | 3/25/20         |
| MT520178         | MA_MGH_00426/2020 | 3/7/20          |
| MT520179         | MA_MGH_00050/2020 | 3/24/20         |
| MT520180         | MA_MGH_00042/2020 | 3/25/20         |
| MT520182         | MA_MGH_00157/2020 | 3/26/20         |
| MT520183         | MA_MGH_00208/2020 | 3/27/20         |
| MT520185         | MA_MGH_00485/2020 | 3/27/20         |
| MT520186         | MA_MGH_00031/2020 | 3/25/20         |
| MT520187         | MA_MGH_00708/2020 | 4/7/20          |
| MT520188         | MA_MGH_00184/2020 | 3/27/20         |
| MT520189         | MA_MGH_00143/2020 | 3/26/20         |
| MT520190         | MA_MGH_00588/2020 | 3/28/20         |
| MT520191         | MA_MGH_00440/2020 | 3/4/20          |
| MT520192         | MA_MGH_00417/2020 | 3/7/20          |
| MT520193         | MA_MGH_00678/2020 | 3/22/20         |
| MT520194         | MA_MGH_00069/2020 | 3/25/20         |
| MT520195         | MA_MGH_00656/2020 | 4/1/20          |
| MT520197         | MA_MGH_00080/2020 | 3/25/20         |
| MT520198         | MA_MGH_00711/2020 | 4/8/20          |
| MT520199         | MA_MGH_00182/2020 | 3/26/20         |
| MT520200         | MA_MGH_00562/2020 | 3/22/20         |
| MT520201         | MA_MGH_00065/2020 | 3/25/20         |
| MT520202         | MA_MGH_00228/2020 | 4/6/20          |
| MT520203         | MA_MGH_00100/2020 | 3/25/20         |
| MT520205         | MA_MGH_00706/2020 | 4/7/20          |
| MT520207         | MA_MGH_00687/2020 | 4/6/20          |
| MT520208         | MA_MGH_00289/2020 | 4/1/20          |
| MT520209         | MA_MGH_00611/2020 | 3/28/20         |
| MT520211         | MA_MGH_00035/2020 | 3/24/20         |
| MT520212         | MA_MGH_00628/2020 | 3/28/20         |
| MT520213         | MA_MGH_00544/2020 | 3/20/20         |
| MT520214         | MA_MGH_00651/2020 | 4/2/20          |
| MT520215         | MA_MGH_00569/2020 | 3/22/20         |
| MT520217         | MA_MGH_00210/2020 | 3/27/20         |
| MT520220         | MA_MGH_00086/2020 | 3/24/20         |
| MT520221         | MA_MGH_00683/2020 | 3/21/20         |
| MT520223         | MA_MGH_00642/2020 | 4/1/20          |
| MT520224         | MA_MGH_00023/2020 | 3/24/20         |



|          |                   |         |
|----------|-------------------|---------|
| MT520225 | MA_MGH_00021/2020 | 3/26/20 |
| MT520226 | MA_MGH_00302/2020 | 4/1/20  |
| MT520227 | MA_MGH_00455/2020 | 4/4/20  |
| MT520228 | MA_MGH_00675/2020 | 4/6/20  |
| MT520229 | MA_MGH_00013/2020 | 3/23/20 |
| MT520231 | MA_MGH_00502/2020 | 3/27/20 |
| MT520233 | MA_MGH_00433/2020 | 3/7/20  |
| MT520237 | MA_MGH_00691/2020 | 4/6/20  |
| MT520240 | MA_MGH_00666/2020 | 4/4/20  |
| MT520241 | MA_MGH_00567/2020 | 3/22/20 |
| MT520242 | MA_MGH_00548/2020 | 3/20/20 |
| MT520249 | MA_MGH_00059/2020 | 3/23/20 |
| MT520253 | MA_MGH_00530/2020 | 3/18/20 |
| MT520254 | MA_MGH_00174/2020 | 3/26/20 |
| MT520255 | MA_MGH_00570/2020 | 3/22/20 |
| MT520257 | MA_MGH_00542/2020 | 3/19/20 |
| MT520258 | MA_MGH_00161/2020 | 3/26/20 |
| MT520259 | MA_MGH_00089/2020 | 3/25/20 |
| MT520261 | MA_MGH_00563/2020 | 3/22/20 |
| MT520263 | MA_MGH_00229/2020 | 4/6/20  |
| MT520265 | MA_MGH_00669/2020 | 4/4/20  |
| MT520266 | MA_MGH_00695/2020 | 4/6/20  |
| MT520267 | MA_MGH_00579/2020 | 3/28/20 |
| MT520268 | MA_MGH_00286/2020 | 4/1/20  |
| MT520269 | MA_MGH_00585/2020 | 3/28/20 |
| MT520271 | MA_MGH_00290/2020 | 4/1/20  |
| MT520272 | MA_MGH_00653/2020 | 4/2/20  |
| MT520273 | MA_MGH_00445/2020 | 4/1/20  |
| MT520274 | MA_MGH_00162/2020 | 3/26/20 |
| MT520275 | MA_MGH_00135/2020 | 3/25/20 |
| MT520279 | MA_MGH_00486/2020 | 3/27/20 |
| MT520280 | MA_MGH_00614/2020 | 3/28/20 |
| MT520281 | MA_MGH_00032/2020 | 3/25/20 |
| MT520282 | MA_MGH_00442/2020 | 3/5/20  |
| MT520283 | MA_MGH_00477/2020 | 4/4/20  |
| MT520284 | MA_MGH_00177/2020 | 3/26/20 |
| MT520286 | MA_MGH_00575/2020 | 3/17/20 |
| MT520290 | MA_MGH_00693/2020 | 4/6/20  |
| MT520291 | MA_MGH_00541/2020 | 3/19/20 |
| MT520293 | MA_MGH_00044/2020 | 3/25/20 |
| MT520294 | MA_MGH_00096/2020 | 3/25/20 |
| MT520295 | MA_MGH_00460/2020 | 4/4/20  |
| MT520296 | MA_MGH_00187/2020 | 3/26/20 |
| MT520297 | MA_MGH_00025/2020 | 3/23/20 |

|          |                   |         |
|----------|-------------------|---------|
| MT520299 | MA_MGH_00521/2020 | 3/16/20 |
| MT520301 | MA_MGH_00469/2020 | 4/4/20  |
| MT520303 | MA_MGH_00423/2020 | 3/7/20  |
| MT520305 | MA_MGH_00474/2020 | 4/4/20  |
| MT520306 | MA_MGH_00680/2020 | 3/22/20 |
| MT520307 | MA_MGH_00555/2020 | 3/22/20 |
| MT520311 | MA_MGH_00168/2020 | 3/26/20 |
| MT520313 | MA_MGH_00151/2020 | 3/26/20 |
| MT520314 | MA_MGH_00437/2020 | 3/7/20  |
| MT520317 | MA_MGH_00206/2020 | 3/27/20 |
| MT520321 | MA_MGH_00717/2020 | 4/8/20  |
| MT520322 | MA_MGH_00491/2020 | 3/27/20 |
| MT520326 | MA_MGH_00038/2020 | 3/24/20 |
| MT520329 | MA_MGH_00650/2020 | 4/2/20  |
| MT520330 | MA_MGH_00299/2020 | 4/1/20  |
| MT520331 | MA_MGH_00657/2020 | 4/3/20  |
| MT520334 | MA_MGH_00236/2020 | 4/6/20  |
| MT520335 | MA_MGH_00306/2020 | 4/1/20  |
| MT520338 | MA_MGH_00190/2020 | 3/26/20 |
| MT520339 | MA_MGH_00049/2020 | 3/23/20 |
| MT520340 | MA_MGH_00298/2020 | 4/1/20  |
| MT520342 | MA_MGH_00681/2020 | 3/22/20 |
| MT520343 | MA_MGH_00699/2020 | 4/6/20  |
| MT520344 | MA_MGH_00093/2020 | 3/29/20 |
| MT520345 | MA_MGH_00604/2020 | 3/28/20 |
| MT520346 | MA_MGH_00014/2020 | 3/23/20 |
| MT520347 | MA_MGH_00458/2020 | 4/4/20  |
| MT520348 | MA_MGH_00580/2020 | 3/28/20 |
| MT520351 | MA_MGH_00583/2020 | 3/28/20 |
| MT520352 | MA_MGH_00716/2020 | 4/8/20  |
| MT520353 | MA_MGH_00715/2020 | 4/8/20  |
| MT520354 | MA_MGH_00597/2020 | 3/28/20 |
| MT520355 | MA_MGH_00209/2020 | 3/26/20 |
| MT520360 | MA_MGH_00566/2020 | 3/22/20 |
| MT520362 | MA_MGH_00644/2020 | 4/1/20  |
| MT520363 | MA_MGH_00203/2020 | 3/27/20 |
| MT520364 | MA_MGH_00622/2020 | 3/28/20 |
| MT520365 | MA_MGH_00166/2020 | 3/26/20 |
| MT520366 | MA_MGH_00048/2020 | 3/23/20 |
| MT520368 | MA_MGH_00705/2020 | 4/6/20  |
| MT520369 | MA_MGH_00265/2020 | 4/1/20  |
| MT520372 | MA_MGH_00064/2020 | 3/25/20 |
| MT520376 | MA_MGH_00159/2020 | 3/26/20 |
| MT520378 | MA_MGH_00085/2020 | 3/24/20 |

|          |                   |         |
|----------|-------------------|---------|
| MT520379 | MA_MGH_00192/2020 | 3/26/20 |
| MT520380 | MA_MGH_00248/2020 | 4/6/20  |
| MT520381 | MA_MGH_00489/2020 | 3/27/20 |
| MT520384 | MA_MGH_00227/2020 | 4/5/20  |
| MT520386 | MA_MGH_00003/2020 | 3/9/20  |
| MT520387 | MA_MGH_00571/2020 | 3/23/20 |
| MT520389 | MA_MGH_00598/2020 | 3/28/20 |
| MT520390 | MA_MGH_00718/2020 | 4/8/20  |
| MT520391 | MA_MGH_00134/2020 | 3/22/20 |
| MT520392 | MA_MGH_00592/2020 | 3/28/20 |
| MT520393 | MA_MGH_00674/2020 | 4/5/20  |
| MT520395 | MA_MGH_00019/2020 | 3/25/20 |
| MT520396 | MA_MGH_00443/2020 | 3/7/20  |
| MT520398 | MA_MGH_00721/2020 | 4/8/20  |
| MT520399 | MA_MGH_00024/2020 | 3/23/20 |
| MT520402 | MA_MGH_00639/2020 | 4/3/20  |
| MT520404 | MA_MGH_00188/2020 | 3/27/20 |
| MT520405 | MA_MGH_00654/2020 | 4/2/20  |
| MT520406 | MA_MGH_00148/2020 | 3/26/20 |
| MT520407 | MA_MGH_00263/2020 | 4/6/20  |
| MT520410 | MA_MGH_00056/2020 | 3/25/20 |
| MT520411 | MA_MGH_00698/2020 | 4/6/20  |
| MT520412 | MA_MGH_00582/2020 | 3/27/20 |
| MT520413 | MA_MGH_00551/2020 | 3/20/20 |
| MT520414 | MA_MGH_00155/2020 | 3/26/20 |
| MT520415 | MA_MGH_00615/2020 | 3/28/20 |
| MT520418 | MA_MGH_00492/2020 | 3/27/20 |
| MT520419 | MA_MGH_00528/2020 | 3/18/20 |
| MT520423 | MA_MGH_00091/2020 | 3/26/20 |
| MT520424 | MA_MGH_00553/2020 | 3/20/20 |
| MT520425 | MA_MGH_00498/2020 | 3/27/20 |
| MT520428 | MA_MGH_00416/2020 | 3/7/20  |
| MT520429 | MA_MGH_00444/2020 | 3/8/20  |
| MT520431 | MA_MGH_00670/2020 | 4/4/20  |
| MT520437 | MA_MGH_00183/2020 | 3/27/20 |
| MT520438 | MA_MGH_00546/2020 | 3/20/20 |
| MT520439 | MA_MGH_00136/2020 | 3/25/20 |
| MT520440 | MA_MGH_00238/2020 | 4/6/20  |
| MT520442 | MA_MGH_00167/2020 | 3/26/20 |
| MT520443 | MA_MGH_00194/2020 | 3/26/20 |
| MT520444 | MA_MGH_00225/2020 | 3/25/20 |
| MT520445 | MA_MGH_00232/2020 | 4/6/20  |
| MT520449 | MA_MGH_00620/2020 | 3/28/20 |
| MT520450 | MA_MGH_00051/2020 | 3/24/20 |

|          |                   |         |
|----------|-------------------|---------|
| MT520451 | MA_MGH_00506/2020 | 3/28/20 |
| MT520455 | MA_MGH_00557/2020 | 3/22/20 |
| MT520456 | MA_MGH_00532/2020 | 3/18/20 |
| MT520457 | MA_MGH_00600/2020 | 3/28/20 |
| MT520458 | MA_MGH_00456/2020 | 4/4/20  |
| MT520461 | MA_MGH_00648/2020 | 4/2/20  |
| MT520462 | MA_MGH_00558/2020 | 3/22/20 |
| MT520463 | MA_MGH_00676/2020 | 3/21/20 |
| MT520466 | MA_MGH_00083/2020 | 3/23/20 |
| MT520468 | MA_MGH_00617/2020 | 3/28/20 |
| MT520470 | MA_MGH_00434/2020 | 3/7/20  |
| MT520471 | MA_MGH_00613/2020 | 3/28/20 |
| MT520472 | MA_MGH_00424/2020 | 3/7/20  |
| MT520473 | MA_MGH_00510/2020 | 3/11/20 |
| MT520474 | MA_MGH_00576/2020 | 3/20/20 |
| MT520476 | MA_MGH_00040/2020 | 3/25/20 |
| MT520477 | MA_MGH_00658/2020 | 4/3/20  |
| MT520480 | MA_MGH_00240/2020 | 4/4/20  |
| MT520484 | MA_MGH_00149/2020 | 3/26/20 |
| MT520486 | MA_MGH_00090/2020 | 3/25/20 |
| MT520487 | MA_MGH_00637/2020 | 4/3/20  |
| MT520489 | MA_MGH_00689/2020 | 4/6/20  |
| MT520490 | MA_MGH_00517/2020 | 3/14/20 |
| MT520491 | MA_MGH_00630/2020 | 4/1/20  |
| MT520492 | MA_MGH_00164/2020 | 3/26/20 |
| MT520493 | MA_MGH_00316/2020 | 4/5/20  |
| MT520496 | MA_MGH_00036/2020 | 3/25/20 |
| MT520497 | MA_MGH_00696/2020 | 4/6/20  |
| MT520498 | MA_MGH_00565/2020 | 3/22/20 |
| MT520499 | MA_MGH_00556/2020 | 3/21/20 |
| MT520500 | MA_MGH_00211/2020 | 3/27/20 |
| MT520502 | MA_MGH_00495/2020 | 3/27/20 |
| MT520503 | MA_MGH_00441/2020 | 3/5/20  |
| MT520505 | MA_MGH_00304/2020 | 4/1/20  |
| MT520511 | MA_MGH_00531/2020 | 3/19/20 |
| MT520512 | MA_MGH_00202/2020 | 3/27/20 |
| MT520513 | MA_MGH_00047/2020 | 3/23/20 |
| MT520514 | MA_MGH_00255/2020 | 4/6/20  |
| MT520519 | MA_MGH_00084/2020 | 3/23/20 |
| MT520520 | MA_MGH_00505/2020 | 3/27/20 |
| MT520522 | MA_MGH_00152/2020 | 3/26/20 |
| MT520523 | MA_MGH_00075/2020 | 3/25/20 |
| MT520524 | MA_MGH_00171/2020 | 3/27/20 |
| MT520526 | MA_MGH_00179/2020 | 3/26/20 |

|          |                   |         |
|----------|-------------------|---------|
| MT520527 | MA_MGH_00539/2020 | 3/19/20 |
| MT520528 | MA_MGH_00165/2020 | 3/26/20 |
| MT520529 | MA_MGH_00459/2020 | 4/4/20  |
| MT520531 | MA_MGH_00552/2020 | 3/20/20 |
| MT520532 | MA_MGH_00181/2020 | 3/26/20 |
| MT520533 | MA_MGH_00525/2020 | 3/18/20 |
| MT520534 | MA_MGH_00499/2020 | 3/27/20 |
| MT520535 | MA_MGH_00537/2020 | 3/19/20 |
| MT520537 | MA_MGH_00150/2020 | 3/26/20 |
| MT520540 | MA_MGH_00679/2020 | 3/22/20 |
| MT520541 | MA_MGH_00178/2020 | 3/26/20 |
| MT520542 | MA_MGH_00004/2020 | 3/11/20 |
| MT520543 | MA_MGH_00199/2020 | 3/27/20 |
| MT520544 | MA_MGH_00028/2020 | 3/25/20 |
| MT520545 | MA_MGH_00132/2020 | 3/25/20 |
| MT520546 | MA_MGH_00205/2020 | 3/27/20 |
| MT873050 | MA-MGH-01491/2020 | 5/7/20  |
| MT873051 | MA-MGH-01623/2020 | 5/9/20  |
| MT873052 | MA-MGH-00976/2020 | 5/3/20  |
| MT873053 | MA-DPH-00217/2020 | 4/13/20 |
| MT873054 | MA-DPH-00297/2020 | 4/17/20 |
| MT873055 | MA-DPH-00043/2020 | 4/2/20  |
| MT873056 | MA-MGH-00868/2020 | 4/14/20 |
| MT873057 | MA-DPH-00198/2020 | 4/7/20  |
| MT873058 | MA-MGH-01169/2020 | 4/29/20 |
| MT873059 | MA-MGH-01194/2020 | 5/4/20  |
| MT873060 | MA-MGH-00789/2020 | 4/13/20 |
| MT873062 | MA-MGH-00883/2020 | 4/14/20 |
| MT873063 | MA-MGH-01137/2020 | 5/2/20  |
| MT873064 | MA-MGH-01358/2020 | 5/6/20  |
| MT873066 | MA-MGH-00902/2020 | 4/6/20  |
| MT873069 | MA-DPH-00322/2020 | 4/18/20 |
| MT873070 | MA-DPH-00060/2020 | 4/3/20  |
| MT873072 | MA-MGH-01027/2020 | 4/30/20 |
| MT873073 | MA-MGH-01409/2020 | 5/6/20  |
| MT873074 | MA-MGH-01166/2020 | 4/29/20 |
| MT873075 | MA-MGH-00830/2020 | 4/13/20 |
| MT873076 | MA-MGH-01381/2020 | 5/6/20  |
| MT873077 | MA-MGH-01114/2020 | 5/2/20  |
| MT873078 | MA-MGH-01260/2020 | 5/4/20  |
| MT873079 | MA-MGH-01201/2020 | 5/4/20  |
| MT873080 | MA-DPH-00003/2020 | 3/5/20  |
| MT873081 | MA-MGH-01081/2020 | 5/1/20  |
| MT873083 | MA-MGH-01120/2020 | 5/2/20  |

|          |                   |         |
|----------|-------------------|---------|
| MT873085 | MA-MGH-00822/2020 | 4/13/20 |
| MT873087 | MA-MGH-01073/2020 | 4/30/20 |
| MT873089 | MA-DPH-00144/2020 | 4/3/20  |
| MT873090 | MA-DPH-00255/2020 | 4/17/20 |
| MT873091 | MA-MGH-01032/2020 | 5/1/20  |
| MT873092 | MA-MGH-01153/2020 | 4/29/20 |
| MT873094 | MA-DPH-00053/2020 | 4/3/20  |
| MT873095 | MA-DPH-00167/2020 | 4/3/20  |
| MT873096 | MA-DPH-00195/2020 | 4/7/20  |
| MT873098 | MA-MGH-01502/2020 | 5/7/20  |
| MT873099 | MA-MGH-00896/2020 | 5/5/20  |
| MT873101 | MA-MGH-01551/2020 | 4/28/20 |
| MT873106 | MA-MGH-00864/2020 | 4/14/20 |
| MT873107 | MA-MGH-00733/2020 | 4/9/20  |
| MT873108 | MA-MGH-01397/2020 | 5/6/20  |
| MT873109 | MA-MGH-00728/2020 | 4/8/20  |
| MT873111 | MA-DPH-00216/2020 | 4/13/20 |
| MT873112 | MA-MGH-01089/2020 | 5/1/20  |
| MT873113 | MA-MGH-00931/2020 | 5/2/20  |
| MT873114 | MA-MGH-00829/2020 | 4/13/20 |
| MT873115 | MA-MGH-01501/2020 | 5/7/20  |
| MT873116 | MA-MGH-00937/2020 | 5/2/20  |
| MT873118 | MA-MGH-00827/2020 | 4/13/20 |
| MT873121 | MA-DPH-00305/2020 | 4/18/20 |
| MT873122 | MA-MGH-01258/2020 | 5/4/20  |
| MT873125 | MA-MGH-01107/2020 | 5/1/20  |
| MT873127 | MA-MGH-01141/2020 | 5/2/20  |
| MT873129 | MA-MGH-01206/2020 | 5/4/20  |
| MT873131 | MA-MGH-01415/2020 | 5/7/20  |
| MT873132 | MA-MGH-00741/2020 | 4/9/20  |
| MT873133 | MA-MGH-01096/2020 | 5/1/20  |
| MT873134 | MA-MGH-01592/2020 | 5/9/20  |
| MT873136 | MA-MGH-00831/2020 | 4/13/20 |
| MT873137 | MA-MGH-00796/2020 | 4/13/20 |
| MT873138 | MA-DPH-00309/2020 | 4/18/20 |
| MT873140 | MA-MGH-01522/2020 | 5/7/20  |
| MT873142 | MA-MGH-01288/2020 | 5/5/20  |
| MT873143 | MA-MGH-01460/2020 | 4/28/20 |
| MT873144 | MA-MGH-01619/2020 | 5/9/20  |
| MT873146 | MA-MGH-00828/2020 | 4/13/20 |
| MT873147 | MA-DPH-00227/2020 | 4/15/20 |
| MT873148 | MA-MGH-00923/2020 | 5/2/20  |
| MT873149 | MA-DPH-00321/2020 | 4/18/20 |
| MT873150 | MA-MGH-00946/2020 | 5/2/20  |

|          |                   |         |
|----------|-------------------|---------|
| MT873152 | MA-MGH-01080/2020 | 5/1/20  |
| MT873154 | MA-MGH-00745/2020 | 4/10/20 |
| MT873155 | MA-DPH-00235/2020 | 4/16/20 |
| MT873156 | MA-DPH-00250/2020 | 4/17/20 |
| MT873159 | MA-MGH-01443/2020 | 4/30/20 |
| MT873160 | MA-DPH-00212/2020 | 4/12/20 |
| MT873161 | MA-DPH-00030/2020 | 4/2/20  |
| MT873162 | MA-DPH-00077/2020 | 4/3/20  |
| MT873163 | MA-DPH-00178/2020 | 4/5/20  |
| MT873164 | MA-MGH-01088/2020 | 5/1/20  |
| MT873166 | MA-MGH-00774/2020 | 4/12/20 |
| MT873167 | MA-MGH-01331/2020 | 5/5/20  |
| MT873170 | MA-MGH-01020/2020 | 4/30/20 |
| MT873171 | MA-DPH-00318/2020 | 4/18/20 |
| MT873173 | MA-MGH-00908/2020 | 4/10/20 |
| MT873174 | MA-DPH-00221/2020 | 4/14/20 |
| MT873175 | MA-MGH-01469/2020 | 5/7/20  |
| MT873178 | MA-DPH-00047/2020 | 4/2/20  |
| MT873180 | MA-DPH-00121/2020 | 4/3/20  |
| MT873182 | MA-MGH-01227/2020 | 5/4/20  |
| MT873184 | MA-MGH-00945/2020 | 5/3/20  |
| MT873185 | MA-MGH-00811/2020 | 4/13/20 |
| MT873186 | MA-MGH-00938/2020 | 5/2/20  |
| MT873187 | MA-MGH-01367/2020 | 5/6/20  |
| MT873189 | MA-DPH-00301/2020 | 4/18/20 |
| MT873191 | MA-MGH-01333/2020 | 5/5/20  |
| MT873192 | MA-MGH-01606/2020 | 5/8/20  |
| MT873193 | MA-DPH-00323/2020 | 4/18/20 |
| MT873194 | MA-DPH-00063/2020 | 4/3/20  |
| MT873196 | MA-MGH-00939/2020 | 5/2/20  |
| MT873197 | MA-DPH-00139/2020 | 4/3/20  |
| MT873201 | MA-MGH-01372/2020 | 5/6/20  |
| MT873202 | MA-MGH-00812/2020 | 4/13/20 |
| MT873203 | MA-DPH-00200/2020 | 4/7/20  |
| MT873205 | MA-DPH-00096/2020 | 4/3/20  |
| MT873206 | MA-MGH-00757/2020 | 4/10/20 |
| MT873208 | MA-DPH-00270/2020 | 4/17/20 |
| MT873209 | MA-MGH-01182/2020 | 4/29/20 |
| MT873210 | MA-MGH-00954/2020 | 5/2/20  |
| MT873211 | MA-DPH-00248/2020 | 4/17/20 |
| MT873214 | MA-MGH-01368/2020 | 5/6/20  |
| MT873215 | MA-MGH-01563/2020 | 5/8/20  |
| MT873216 | MA-MGH-01343/2020 | 5/5/20  |
| MT873219 | MA-MGH-00858/2020 | 4/14/20 |

|          |                   |         |
|----------|-------------------|---------|
| MT873223 | MA-MGH-01065/2020 | 5/1/20  |
| MT873225 | MA-DPH-00252/2020 | 4/17/20 |
| MT873227 | MA-MGH-01605/2020 | 5/8/20  |
| MT873229 | MA-DPH-00311/2020 | 4/18/20 |
| MT873232 | MA-MGH-00837/2020 | 4/13/20 |
| MT873234 | MA-MGH-00761/2020 | 4/11/20 |
| MT873235 | MA-DPH-00208/2020 | 4/10/20 |
| MT873237 | MA-MGH-01076/2020 | 5/1/20  |
| MT873238 | MA-MGH-00906/2020 | 4/17/20 |
| MT873239 | MA-MGH-01021/2020 | 4/30/20 |
| MT873241 | MA-DPH-00078/2020 | 4/3/20  |
| MT873242 | MA-MGH-01407/2020 | 5/6/20  |
| MT873243 | MA-DPH-00057/2020 | 4/3/20  |
| MT873244 | MA-MGH-00799/2020 | 4/13/20 |
| MT873245 | MA-MGH-01467/2020 | 5/6/20  |
| MT873246 | MA-DPH-00022/2020 | 4/2/20  |
| MT873248 | MA-DPH-00099/2020 | 4/3/20  |
| MT873250 | MA-MGH-01257/2020 | 5/4/20  |
| MT873251 | MA-MGH-00977/2020 | 5/3/20  |
| MT873252 | MA-MGH-00782/2020 | 4/12/20 |
| MT873253 | MA-MGH-01022/2020 | 4/30/20 |
| MT873255 | MA-DPH-00185/2020 | 4/6/20  |
| MT873256 | MA-DPH-00294/2020 | 4/17/20 |
| MT873257 | MA-MGH-01151/2020 | 4/29/20 |
| MT873259 | MA-MGH-01552/2020 | 4/28/20 |
| MT873260 | MA-MGH-00921/2020 | 5/2/20  |
| MT873262 | MA-DPH-00189/2020 | 4/6/20  |
| MT873264 | MA-MGH-01196/2020 | 5/3/20  |
| MT873265 | MA-MGH-01048/2020 | 5/1/20  |
| MT873267 | MA-MGH-00758/2020 | 4/10/20 |
| MT873268 | MA-MGH-00848/2020 | 4/13/20 |
| MT873270 | MA-MGH-01256/2020 | 5/4/20  |
| MT873271 | MA-DPH-00324/2020 | 4/18/20 |
| MT873272 | MA-MGH-00762/2020 | 4/11/20 |
| MT873273 | MA-DPH-00122/2020 | 4/3/20  |
| MT873275 | MA-DPH-00265/2020 | 4/17/20 |
| MT873276 | MA-MGH-01442/2020 | 4/30/20 |
| MT873278 | MA-MGH-01033/2020 | 4/30/20 |
| MT873280 | MA-MGH-00958/2020 | 5/3/20  |
| MT873281 | MA-DPH-00150/2020 | 4/3/20  |
| MT873285 | MA-DPH-00271/2020 | 4/17/20 |
| MT873288 | MA-MGH-00784/2020 | 4/13/20 |
| MT873289 | MA-MGH-00826/2020 | 4/13/20 |
| MT873290 | MA-MGH-01544/2020 | 4/28/20 |



|          |                   |         |
|----------|-------------------|---------|
| MT873291 | MA-MGH-01408/2020 | 5/6/20  |
| MT873293 | MA-MGH-00900/2020 | 5/5/20  |
| MT873295 | MA-DPH-00243/2020 | 4/16/20 |
| MT873297 | MA-MGH-00993/2020 | 4/30/20 |
| MT873298 | MA-MGH-00732/2020 | 4/9/20  |
| MT873299 | MA-DPH-00204/2020 | 4/9/20  |
| MT873300 | MA-MGH-01011/2020 | 4/30/20 |
| MT873301 | MA-MGH-01297/2020 | 5/5/20  |
| MT873302 | MA-DPH-00230/2020 | 4/15/20 |
| MT873305 | MA-MGH-00766/2020 | 4/11/20 |
| MT873306 | MA-MGH-00767/2020 | 4/11/20 |
| MT873310 | MA-DPH-00246/2020 | 4/16/20 |
| MT873312 | MA-MGH-01060/2020 | 5/1/20  |
| MT873313 | MA-DPH-00009/2020 | 3/7/20  |
| MT873315 | MA-DPH-00223/2020 | 4/14/20 |
| MT873316 | MA-MGH-01632/2020 | 4/28/20 |
| MT873317 | MA-MGH-01235/2020 | 5/4/20  |
| MT873321 | MA-DPH-00129/2020 | 4/3/20  |
| MT873322 | MA-MGH-00870/2020 | 4/14/20 |
| MT873324 | MA-MGH-01405/2020 | 5/6/20  |
| MT873325 | MA-DPH-00220/2020 | 4/13/20 |
| MT873328 | MA-DPH-00052/2020 | 4/3/20  |
| MT873330 | MA-DPH-00157/2020 | 4/3/20  |
| MT873332 | MA-DPH-00011/2020 | 3/10/20 |
| MT873334 | MA-MGH-01380/2020 | 5/6/20  |
| MT873335 | MA-MGH-01132/2020 | 5/2/20  |
| MT873337 | MA-MGH-00738/2020 | 4/9/20  |
| MT873338 | MA-MGH-01543/2020 | 4/28/20 |
| MT873339 | MA-MGH-00869/2020 | 4/14/20 |
| MT873340 | MA-MGH-00753/2020 | 4/10/20 |
| MT873341 | MA-MGH-01319/2020 | 5/5/20  |
| MT873343 | MA-DPH-00109/2020 | 4/3/20  |
| MT873344 | MA-MGH-00878/2020 | 4/14/20 |
| MT873346 | MA-MGH-01593/2020 | 5/9/20  |
| MT873348 | MA-DPH-00261/2020 | 4/17/20 |
| MT873350 | MA-MGH-01495/2020 | 5/7/20  |
| MT873351 | MA-DPH-00197/2020 | 4/7/20  |
| MT873352 | MA-MGH-00871/2020 | 4/14/20 |
| MT873353 | MA-MGH-00764/2020 | 4/11/20 |
| MT873354 | MA-MGH-01350/2020 | 5/6/20  |
| MT873355 | MA-DPH-00256/2020 | 4/17/20 |
| MT873356 | MA-DPH-00090/2020 | 4/3/20  |
| MT873357 | MA-MGH-00873/2020 | 4/14/20 |
| MT873358 | MA-DPH-00257/2020 | 4/17/20 |

|          |                   |         |
|----------|-------------------|---------|
| MT873360 | MA-MGH-00760/2020 | 4/10/20 |
| MT873361 | MA-MGH-01338/2020 | 5/5/20  |
| MT873363 | MA-MGH-00740/2020 | 4/9/20  |
| MT873365 | MA-MGH-00817/2020 | 4/13/20 |
| MT873367 | MA-MGH-01045/2020 | 5/1/20  |
| MT873368 | MA-MGH-00916/2020 | 5/2/20  |
| MT873369 | MA-DPH-00209/2020 | 4/10/20 |
| MT873370 | MA-MGH-01304/2020 | 5/5/20  |
| MT873371 | MA-MGH-01145/2020 | 5/2/20  |
| MT873372 | MA-MGH-00947/2020 | 5/2/20  |
| MT873375 | MA-MGH-00926/2020 | 5/2/20  |
| MT873376 | MA-MGH-01108/2020 | 5/2/20  |
| MT873378 | MA-MGH-00734/2020 | 4/9/20  |
| MT873380 | MA-MGH-00816/2020 | 4/13/20 |
| MT873381 | MA-MGH-00959/2020 | 5/3/20  |
| MT873384 | MA-MGH-01057/2020 | 5/1/20  |
| MT873386 | MA-DPH-00037/2020 | 4/2/20  |
| MT873388 | MA-DPH-00066/2020 | 4/3/20  |
| MT873389 | MA-MGH-00992/2020 | 5/1/20  |
| MT873390 | MA-DPH-00124/2020 | 4/3/20  |
| MT873391 | MA-MGH-01504/2020 | 5/7/20  |
| MT873394 | MA-DPH-00010/2020 | 3/7/20  |
| MT873395 | MA-DPH-00306/2020 | 4/18/20 |
| MT873396 | MA-MGH-01121/2020 | 5/2/20  |
| MT873397 | MA-MGH-01382/2020 | 5/6/20  |
| MT873398 | MA-DPH-00028/2020 | 4/2/20  |
| MT873399 | MA-DPH-00238/2020 | 4/16/20 |
| MT873400 | MA-MGH-01387/2020 | 5/6/20  |
| MT873402 | MA-DPH-00158/2020 | 4/3/20  |
| MT873406 | MA-MGH-01586/2020 | 5/9/20  |
| MT873407 | MA-MGH-01344/2020 | 5/5/20  |
| MT873408 | MA-MGH-01207/2020 | 5/4/20  |
| MT873410 | MA-MGH-01452/2020 | 4/30/20 |
| MT873412 | MA-MGH-01017/2020 | 4/30/20 |
| MT873415 | MA-DPH-00313/2020 | 4/18/20 |
| MT873416 | MA-DPH-00202/2020 | 4/8/20  |
| MT873420 | MA-MGH-01071/2020 | 4/30/20 |
| MT873423 | MA-MGH-01070/2020 | 5/1/20  |
| MT873425 | MA-DPH-00186/2020 | 4/6/20  |
| MT873427 | MA-DPH-00086/2020 | 4/3/20  |
| MT873430 | MA-MGH-01157/2020 | 4/29/20 |
| MT873431 | MA-DPH-00051/2020 | 4/2/20  |
| MT873432 | MA-MGH-00788/2020 | 4/13/20 |
| MT873433 | MA-MGH-01365/2020 | 5/6/20  |

|                |                   |         |
|----------------|-------------------|---------|
| MT873434       | MA-DPH-00268/2020 | 4/17/20 |
| MT873435       | MA-DPH-00044/2020 | 4/2/20  |
| MT873436       | MA-DPH-00163/2020 | 4/3/20  |
| MT873439       | MA-DPH-00089/2020 | 4/3/20  |
| MT873441       | MA-DPH-00031/2020 | 4/2/20  |
| MT873443       | MA-DPH-00283/2020 | 4/17/20 |
| MT873444       | MA-DPH-00083/2020 | 4/3/20  |
| MT873446       | MA-DPH-00229/2020 | 4/15/20 |
| MT873447       | MA-MGH-01448/2020 | 4/30/20 |
| MT873449       | MA-MGH-01119/2020 | 5/2/20  |
| MT873454       | MA-DPH-00095/2020 | 4/3/20  |
| MT873455       | MA-DPH-00134/2020 | 4/3/20  |
| MT873456       | MA-MGH-00887/2020 | 4/14/20 |
| MT873457       | MA-DPH-00236/2020 | 4/16/20 |
| MT873459       | MA-MGH-00903/2020 | 4/8/20  |
| MT873460       | MA-DPH-00035/2020 | 4/2/20  |
| MT873461       | MA-MGH-01161/2020 | 4/29/20 |
| MT873462       | MA-DPH-00062/2020 | 4/3/20  |
| MT873471       | MA-MGH-00775/2020 | 4/12/20 |
| MT873472       | MA-MGH-01110/2020 | 5/1/20  |
| MT873474       | MA-DPH-00120/2020 | 4/3/20  |
| MT873475       | MA-MGH-01271/2020 | 4/29/20 |
| MT873478       | MA-DPH-00155/2020 | 4/3/20  |
| MT873480       | MA-DPH-00048/2020 | 4/2/20  |
| MT873481       | MA-MGH-01471/2020 | 5/6/20  |
| MT873482       | MA-MGH-00855/2020 | 4/13/20 |
| MT873483       | MA-MGH-01580/2020 | 5/8/20  |
| MT873485       | MA-MGH-00814/2020 | 4/13/20 |
| MT873486       | MA-MGH-00840/2020 | 4/13/20 |
| MT873488       | MA-MGH-00866/2020 | 4/14/20 |
| MT873490       | MA-MGH-01248/2020 | 5/4/20  |
| MT873492       | MA-MGH-00768/2020 | 4/11/20 |
| MT873494       | MA-MGH-01329/2020 | 5/5/20  |
| MT873495       | MA-DPH-00263/2020 | 4/17/20 |
| MT873497       | MA-DPH-00002/2020 | 3/3/20  |
| MT873500       | MA-MGH-00773/2020 | 4/12/20 |
| MT873502       | MA-DPH-00171/2020 | 4/3/20  |
| MT873503       | MA-MGH-00886/2020 | 4/14/20 |
| MT873506       | MA-DPH-00192/2020 | 4/6/20  |
| MT873508       | MA-DPH-00055/2020 | 4/3/20  |
| MT873509       | MA-MGH-00853/2020 | 4/13/20 |
| MT873510       | MA-MGH-00730/2020 | 4/9/20  |
| EPI_ISL_456115 | NY-NYUMC843/2020  | 5/3/20  |
| EPI_ISL_467377 | NY-NYUMC884/2020  | 5/3/20  |

|                |                  |         |
|----------------|------------------|---------|
| EPI_ISL_467379 | NY-NYUMC886/2020 | 5/8/20  |
| EPI_ISL_467384 | NY-NYUMC891/2020 | 5/10/20 |
| EPI_ISL_467386 | NY-NYUMC893/2020 | 5/8/20  |
| EPI_ISL_467390 | NY-NYUMC897/2020 | 5/9/20  |
| EPI_ISL_467400 | NY-NYUMC907/2020 | 5/7/20  |
| EPI_ISL_467403 | NY-NYUMC910/2020 | 5/7/20  |
| EPI_ISL_467404 | NY-NYUMC911/2020 | 5/7/20  |
| EPI_ISL_467405 | NY-NYUMC912/2020 | 5/8/20  |
| EPI_ISL_467406 | NY-NYUMC913/2020 | 5/7/20  |
| EPI_ISL_467407 | NY-NYUMC914/2020 | 5/8/20  |
| EPI_ISL_467408 | NY-NYUMC915/2020 | 5/8/20  |
| EPI_ISL_495497 | WI-UW-793/2020   | 7/5/20  |
| EPI_ISL_526686 | NY-MH001867/2020 | 5/10/20 |
| EPI_ISL_526688 | NY-MH001832/2020 | 5/6/20  |
| EPI_ISL_452145 | CT-Yale-333/2020 | 5/12/20 |
| EPI_ISL_484972 | NY-UW-597/2020   | 6/27/20 |
| EPI_ISL_491316 | MA-UW-633/2020   | 6/27/20 |
| EPI_ISL_421584 | NJ-NYUMC83/2020  | 3/18/20 |
| EPI_ISL_421389 | NY-PV08434/2020  | 3/18/20 |
| EPI_ISL_418973 | NY-NYUMC27/2020  | 3/17/20 |
| EPI_ISL_414476 | NY1-PV08001/2020 | 2/29/20 |
| EPI_ISL_415151 | NY2-PV08100/2020 | 3/4/20  |
| EPI_ISL_418977 | NY-NYUMC31/2020  | 3/17/20 |
| EPI_ISL_409067 | MA1/2020         | 1/29/20 |
| EPI_ISL_427161 | CT-UW-3845/2020  | 3/25/20 |
| EPI_ISL_424174 | CT-UW-1365/2020  | 3/13/20 |

## **ACKNOWLEDGEMENTS**

First and foremost, we are profoundly grateful to this patient and his family for their kindness, generosity, and the innumerable lessons that he taught us throughout his life. We thank Rebecca Zaffini, Mischa Covington, and other members of the Clinical Microbiology Laboratory at Brigham and Women's Hospital (BWH) and Drs. Daimon Simmons and Nicole Tolan of the Department of Pathology at BWH for their assistance and expertise. We acknowledge Jacob Plaisted of the Autopsy Division of the BWH Department of Pathology for his dedication and expertise in safely performing the technical aspects of the autopsy. We appreciate the assistance of the BWH Center for Clinical Investigation and the Mass General Brigham Biobank. Lastly, we thank the physicians, physician assistants, nurses, respiratory therapists, custodial staff, and other team members that participated in the care of this patient.

## **SUPPLEMENTAL REFERENCES**

1. Martinot M, Jary A, Fafi-Kremer S, et al. Remdesivir failure with SARS-CoV-2 RNA-dependent RNA-polymerase mutation in a B-cell immunodeficient patient with protracted Covid-19. *Clin Infect Dis* 2020 Sep 28 (Epub ahead of print).
2. Baang JH SC, Mirabelli C, Valesano AL, et al. Prolonged SARS-CoV-2 replication in an immunocompromised patient. 2020 Sep 22 (<https://www.medrxiv.org/content/10.1101/2020.09.20.20196899v1>) Preprint.
3. Tillett RL SJ, Hartley PD, Kerwin H, et al. Genomic evidence for reinfection with SARS-CoV-2: a case study. *Lancet* 2020 Oct 12 (Epub ahead of print).
4. Mulder M, Van Der Vegt DSJM, Oude Munnink BB, et al. Reinfection of SARS-CoV-2 in an immunocompromised patient: a case report. *Clinical Infectious Diseases* 2020 Oct 9 (Epub ahead of print).
5. Fact sheet for health care providers: Emergency use authorization (EUA) of Veklury® (remdesivir). Silver Spring, MD: The U.S. Food and Drug Administration (FDA), August 2020. (<https://www.fda.gov/media/137566/download>).
6. Baum A, Fulton BO, Wloga E, et al. Antibody cocktail to SARS-CoV-2 spike protein prevents rapid mutational escape seen with individual antibodies. *Science* 2020;369:1014-8.
7. Deane KD, West SG. Antiphospholipid Antibodies as a Cause of Pulmonary Capillaritis and Diffuse Alveolar Hemorrhage: A Case Series and Literature Review. *Seminars in Arthritis and Rheumatism* 2005;35:154-65.
8. Cervera R, Piette J-C, Font J, et al. Antiphospholipid syndrome: Clinical and immunologic manifestations and patterns of disease expression in a cohort of 1,000 patients. *Arthritis & Rheumatism* 2002;46:1019-27.
9. Wölfel R, Corman VM, Guggemos W, et al. Virological assessment of hospitalized patients with COVID-2019. *Nature* 2020;581:465-9.
10. He X, Lau EHY, Wu P, et al. Temporal dynamics in viral shedding and transmissibility of COVID-19. *Nat Med* 2020;26:672-5.
11. Yonker LM, Neilan AM, Bartsch Y, et al. Pediatric SARS-CoV-2: Clinical Presentation, Infectivity, and Immune Responses. *The Journal of Pediatrics* 2020:S0022347620310234.
12. Elbe S, Buckland-Merrett G. Data, disease and diplomacy: GISAID's innovative contribution to global health. *Glob Chall* 2017;1:33-46.
13. Research Use Only 2019-Novel Coronavirus (2019-nCoV) Real-time RT-PCR Primers and Probes. Atlanta, GA: Centers for Disease Control and Prevention, April 2020. (<https://www.cdc.gov/coronavirus/2019-ncov/downloads/rt-pcr-panel-primer-probes.pdf>).
14. Fajnzylber JM, Regan J, Coxen K, et al. SARS-CoV-2 Viral Load is Associated with Increased Disease Severity and Mortality. 2020 Jul 17 (<https://www.medrxiv.org/content/10.1101/2020.07.15.20131789v1>) Preprint.
15. Yonker LM, Neilan AM, Bartsch Y, et al. Pediatric SARS-CoV-2: Clinical Presentation, Infectivity, and Immune Responses. *J Pediatr* 2020 Aug 20 (Epub ahead of print).
16. Palmer S, Wiegand AP, Maldarelli F, et al. New real-time reverse transcriptase-initiated PCR assay with single-copy sensitivity for human immunodeficiency virus type 1 RNA in plasma. *J Clin Microbiol* 2003;41:4531-6.
17. Gonzalez-Reiche AS, Hernandez MM, Sullivan MJ, et al. Introductions and early spread of SARS-CoV-2 in the New York City area. *Science* 2020;369:297-301.
18. nCoV-2019 sequencing protocol v1. 2020. at <https://www.protocols.io/view/ncov-2019-sequencing-protocol-bbmuik6w>.
19. Shepard SS, Meno S, Bahl J, Wilson MM, Barnes J, Neuhaus E. Viral deep sequencing needs an adaptive approach: IRMA, the iterative refinement meta-assembler. *BMC Genomics* 2016;17:708.
20. Katoh K, Rozewicki J, Yamada KD. MAFFT online service: multiple sequence alignment, interactive sequence choice and visualization. *Brief Bioinform* 2019;20:1160-6.
21. Trifinopoulos J, Nguyen LT, von Haeseler A, Minh BQ. W-IQ-TREE: a fast online phylogenetic tool for maximum likelihood analysis. *Nucleic Acids Res* 2016;44:W232-5.
22. Harcourt J, Tamin A, Lu X, et al. Severe Acute Respiratory Syndrome Coronavirus 2 from Patient with Coronavirus Disease, United States. *Emerg Infect Dis* 2020;26:1266-73.
23. Brown EP, Licht AF, Dugast AS, et al. High-throughput, multiplexed IgG subclassing of antigen-specific antibodies from clinical samples. *J Immunol Methods* 2012;386:117-23.
